# Supplementary material
Source: ML conference proceedings conference paper supplement (https://openreview.net/forum?id=3NbMnPh7vM)
Supplement: supplementary_material [file attachment]

# MASTERING DOMAIN SHIFT IMAGE ENHANCEMENT VIA DIFFERENTIABLE PHYSICS

**Anonymous authors**

Paper under double-blind review

## ABSTRACT

Visual perception in the wild have demonstrated transformative potential across a wide range of applications, spanning from planetary exploration to deep-sea monitoring missions. However, a fundamental challenge remains in enabling visual perception enhancement that can explicitly extract rules and support interactive, precise manipulation in unknown, dynamic environments—particularly under conditions of large scale data absence, heterogeneous data distribution, and without the supervision of annotated images. Our approach introduces a differentiable physics framework that unifies the camera response model (CRM) with deep learning to achieve visual perception enhancement under multiple degradation conditions. Specifically, grounded in fundamental principles of radiation physics, we formulate the camera response function (CRF) calibration as a constrained optimization problem. Then we reconstruct the brightness transformation function (BTF) in traditional CRM as a multi-scale generative network, completely decoupling it from the CRF. Meanwhile, we design a dual-branch contrastive encoder that enables the BTF to regulate the irradiance enhancement process through multi-scale exposure distributions learned from guide images. This offers a flexible BTF interface supporting stable and controllable domain generalization for image enhancement. Through comprehensive experiments, our method significantly advances domain generalization capabilities in adaptive image enhancement, outperforming specialized counterparts by margins of +1.226 (UIQM) averaged across challenging unseen underwater domains.

## 1 INTRODUCTION

Visual perception in the wild faces the fundamental challenges of data scarcity and unknown environmental dynamics. Furthermore, the degradation types in wild environments exhibit a highly heterogeneous nature, and the underlying degradation mechanisms vary significantly across different scenarios—such as intense radiation noise on planetary surfaces and aqueous scattering-induced blur in deep-sea environments. Traditional deep neural network methods Xu et al. (2020b); Shi et al. (2024); Lv et al. (2024); Wang et al. (2024a) lack physical interpretability, and their generalization capability is constrained by the coverage of training data, making them ineffective in achieving cross-domain image enhancement. For instance, the aforementioned methods Wang et al. (2024a); Shi et al. (2024), although capable of cross-domain image enhancement, are constrained by their mandatory reliance on cross domain data during training, which fundamentally limits their performance when operating without any target-domain priors. As demonstrated in **Appendix** Figure 9, when trained exclusively on single-domain low-quality datasets, both comparative models exhibit substantial performance degradation in unseen distorted domains, failing to meet expected enhancement requirements.

To enhance the adaptability of models in complex dynamic environments and improve their inherent interpretability, the fundamental solution lies in designing constraints for models based on explicit physical rules or optical models. Recent theoretical analyses Ren et al. (2018); Mao et al. (2025) suggest the CRM provides a promising pathway. CRM mathematically decomposes imaging physics into CRF and BTF, theoretically enabling radiometric calibration. However, existing BTFs rely on exposure ratio estimation rooted in classical Retinex theory, thereby only exhibiting a singular brightness adjustment capability and failing to address the issue of improving comprehensive visual quality in aspects such as chromaticity, contrast, and sharpness. Furthermore, in dynamic and open

environments, there exist significant discrepancies among degraded domains, and current BTF-based approaches cannot achieve effective generalization across different degraded domains.

To overcome the challenges aforementioned, building upon the CRM and integrating principles of radiometry, we construct a differentiable physical model for more flexible image enhancement: i) Decoupling the strong correlation between the CRF and the BTF, we reconstruct the modeling of the traditional BTF (based on simple nonlinear functions) to be implemented by an generative network. Meanwhile, a physical constraint is designed for this generative network to guide its optimization trajectory. ii) Furthermore, to enhance the domain generalization capability and flexibility of the method, we design an adaptive feature fusion scheme based on empirical cumulative distribution functions (eCDFs) matching, introducing an interactive and precise regulation mechanism for the BTF. These improvements necessitate corresponding innovations in network design and feature extraction mechanisms. Specifically, to materialize the reconstructed BTF framework (i) and the adaptive fusion scheme (ii), we develop two core technical innovations: **(1) Stable Calibration of CRF:** Guided by fundamental physical principles, we derive the data acquisition process required for CRF calibration and formulate a constrained optimization problem which is subsequently solved using the ADMM algorithm. **(2) Latent Feature Extraction:** To optimize the effect of adaptive feature fusion, we design a dual-branch contrastive encoder. This encoder employs a symmetrical sampling strategy and adheres to the principle of mutual information maximization, aiming to extract highly discriminative features, which consequently significantly enhances the generalization capability of the proposed method across diverse degradation domains.

Our contributions are fourfold: (1) We replace traditional nonlinear BTF with an image generative network by decoupling CRF-BTF correlation, enabling flexible brightness transformation. (2) We derive the fundamental theory for CRF calibration based on radiometric principles. Combined with the EMA-ADMM algorithm, more stable weighting values for the camera response basis functions are obtained. (3) We propose CAE that extracts compact intra-domain latent features with high inter-domain separability, consolidates cross-scenario/device invariant representations to preserve texture details and rectify radiometric properties, thereby enhancing cross-domain discriminability. (4) We propose an adaptive eCDFs matching mechanism to generate implicit exposure rate representations for BTF, enabling target-domain high-quality latent features to guide enhanced image generation with domain-shift adaptation.

## 2 METHODOLOGY

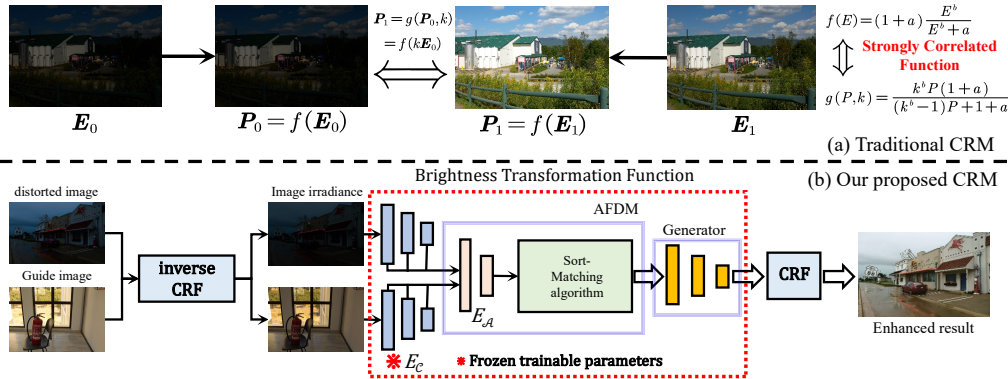

Figure 1: Comparisons of our proposed CRM and conventional CRM

### 2.1 PROBLEM FORMULATION

Computer vision algorithms often assume image intensity reflects scene irradiance, but cameras use nonlinear in-camera processes. Ignoring these degrades algorithms relying on irradiance/illumination estimation. To model such nonlinearities, CRF links scene irradiance to pixel values. When exposure changes, sensor irradiance varies linearly, but image intensity typically doesn't—creating a nonlinear BTF between differently exposed images of the same scene. CRF and

BTF form the CRM, with the comparametric equation  $g(f(\bullet), k) = f(k\bullet)$  relating  $f$  and  $g$  for mutual conversion where  $\bullet$ ,  $k$  stand for irradiance value of any image and exposure ratio, respectively.

Given a distorted image  $\mathbf{P}_x$ , in traditional CRM based image enhancement algorithms, the enhancement process can be described as:

$$\widehat{\mathbf{P}}_x = f(\mathbf{E}_x \circ k) = g(f(\mathbf{E}_x), \mathbf{1} \otimes \mathbf{L}_x) = g(\mathbf{P}_x, \mathbf{1} \otimes \mathbf{L}_x), \quad (1)$$

where  $\mathbf{L}_x$  stand for the illumination map of distorted image  $\mathbf{P}_x$ . It is calculated by Retinex decomposition ( $\mathbf{P}_x = \mathbf{R}_x \circ \mathbf{L}_x$ ).  $\mathbf{E}_x$  represents the image irradiance of  $\mathbf{P}_x$ .

Thus, to satisfy equation  $g(f(\mathbf{E}_x), k) = f(k\mathbf{E}_x)$ ,  $g$  is usually derived from  $f$ , and they are deeply coupled, resulting in poor flexibility. Meanwhile, solving the exposure ratio  $k$  relies heavily on traditional Retinex theory, which is completely ineffective for domain shifts in dynamic open environments.

Addressing the practical pain points of existing CRM based image enhancement methods, our research focuses on improving the BTF to enable flexible irradiance enhancement, followed by deriving the final enhanced image pixel values via CRF. We provide a concise illustration in Figure 1. Specifically, leveraging the capability of generative adversarial networks (GANs) in image generation, improvements are first made to the equation  $g(f(\mathbf{E}_x), k) = f(k\mathbf{E}_x)$ . Concurrently, leveraging the advantage of contrastive learning in extracting highly discriminative features, we introduce guide images for cross-domain latent feature extraction. This approach enhances the domain shift robustness of the proposed algorithm and enables effective domain generalization.

## 2.2 CRF CALIBRATION

To obtain accurate irradiance values from pixel values, we first need to calibrate the CRF of the optical sensor. To achieve CRF calibration without relying on any sensor configuration information, we first derive the following theorem based on radiometric principles:

**Theorem 1.** *For two color patches  $i$  and  $j$  in the Macbeth ColorChecker under the same illumination field, we have  $\frac{S_i}{S_j} = \frac{R_i \cdot I}{R_j \cdot I} = \frac{R_i}{R_j} \Rightarrow \frac{E_i}{E_j} = \frac{R_i}{R_j}$ , where  $S_{i,j}$  and  $R_{i,j}$  denote the scene radiances and reflectances of color patches  $i$  and  $j$ , respectively.*

**Proof:** See **Appendix** for details. Theorem 1 indicates that the ratio of image irradiances  $E_i$  and  $E_j$  generated by the two color patches is equal to the ratio of their reflectances  $R_i$  and  $R_j$ . These reflectances are pre-measured with high precision and publicly available. According to the definition of CRF in Grossberg & Nayar (2003),  $f$  is a monotonically increasing function satisfying  $f(0) = 0$  and  $f(1) = 1$ . Thus, we can set the irradiance of the reference white patch to 1, and further derive the irradiances of all other arbitrary color patches.

Due to the limited camera types and outdated models in the DoRF dataset Grossberg & Nayar (2003), directly modeling the CRF of modern cameras using this dataset is infeasible. To construct a Camera Response Model (CRM) based on the CRFs of new camera models, we draw inspiration from EMoR and derive its general form as  $f = f_0 + \sum_{i=0}^M c_i^* q_i$ . Here, the basis function matrix  $\mathbf{H}$  is constructed using  $n$  pairs of sampling points  $(\widehat{E}_1, \widehat{P}_1), \dots, (\widehat{E}_n, \widehat{P}_n)$  ( $\widehat{E}_1 < \widehat{E}_2 < \dots < \widehat{E}_n$ ) collected from the new camera:

$$\mathbf{H} = \begin{bmatrix} q_1(\widehat{E}_1) & q_2(\widehat{E}_1) & \cdots & q_M(\widehat{E}_1) \\ \vdots & \vdots & \ddots & \vdots \\ q_1(\widehat{E}_n) & q_2(\widehat{E}_n) & \cdots & q_M(\widehat{E}_n) \end{bmatrix}_{n \times M} \quad (2)$$

where  $p_i$  are obtained by performing Principal Component Analysis (PCA) on 171 selected curves from the DoRF dataset Grossberg & Nayar (2003).

Subsequently, the problem of solving for  $\mathbf{c}^* = [c_1^*, \dots, c_M^*]^T$  is transformed into an optimization problem that minimizes the cost function  $\|\mathbf{H}\mathbf{c} - \mathbf{b}\|^2$ . Here,  $f_0$  represents the average curve of CRFs in the DoRF dataset Grossberg & Nayar (2003), and  $\mathbf{b} = [\widehat{P}_1 - f_0(\widehat{E}_1), \dots, \widehat{P}_n - f_0(\widehat{E}_n)]^T$ . To enforce the monotonicity of the CRF to be solved, we construct a discrete differential operator  $D$  as

162 follows:

$$163 \quad \Delta \widehat{E}_i = \widehat{E}_{i+1} - \widehat{E}_i \quad (i = 1, 2, \dots, n-1), \quad D_{i,j} = \begin{cases} -\frac{1}{\Delta \widehat{E}_i} & \text{if } j = i \\ +\frac{1}{\Delta \widehat{E}_i} & \text{if } j = i + 1 \\ 0 & \text{otherwise} \end{cases} \quad (3)$$

164 The original optimization problem is formulated as:

$$165 \quad \min_{\mathbf{c}} \frac{1}{2} \|\mathbf{H}\mathbf{c} - \mathbf{b}\|^2 \quad (4)$$

$$166 \quad \text{s.t.} \quad [D(\mathbf{H}\mathbf{c} + \mathbf{f}_0)]_i \geq 0, \quad \mathbf{f}_0 = [f_0(\widehat{E}_1), f_0(\widehat{E}_2), \dots, f_0(\widehat{E}_n)]^T$$

167 To derive its equivalent form using the Alternating Direction Method of Multipliers (ADMM), we  
168 first introduce an auxiliary variable  $\mathbf{z}$ . By rewriting the constraint with the indicator function  $I_{\mathcal{K}}(\mathbf{z})$   
169 (where  $I_{\mathcal{K}}(\mathbf{z}) = 0$  if  $\mathbf{z} \geq 0$ , and  $I_{\mathcal{K}}(\mathbf{z}) = +\infty$  otherwise;  $\mathcal{K} = \{\mathbf{z} \in \mathbb{R}^n \mid \mathbf{z} \geq 0\}$ ), the original  
170 problem is transformed into:

$$171 \quad \min_{\mathbf{c}, \mathbf{z}} \frac{1}{2} \|\mathbf{H}\mathbf{c} - \mathbf{b}\|^2 + I_{\mathcal{K}}(\mathbf{z}) \quad \text{s.t.} \quad \mathbf{z} = D(\mathbf{H}\mathbf{c} + \mathbf{f}_0) \quad (5)$$

172 We incorporate an Exponential Moving Average (EMA) scheme to enhance the ADMM Themelis &  
173 Patrinos (2020), which is then used to solve the aforementioned constrained optimization problem.

### 174 2.3 DUAL-BRANCH CONTRASTIVE LEARNING BASED BTF

175 We utilize a deep convolutional network to model the BTF, and the BTF proposed in our work con-  
176 sists of a generator network, a discriminator network, and an adaptive feature distribution matching  
177 (AFDM) module (shown in Figure 1 (b)).

#### 178 2.3.1 PRE-TRAINING OF CAE

179 Conventional BTF is strongly associated with CRF; however, as illustrated in Figure 1, BTF and  
180 CRF are completely decoupled in our proposed method. Given a non-corresponding pair of images  
181  $\mathbf{P}_x, \mathbf{P}_y$  in the distorted domain  $\mathcal{X} \subset \mathbb{R}^{H \times W \times 3}$  and normal-exposure domain  $\mathcal{Y} \subset \mathbb{R}^{H \times W \times 3}$ , the  
182 irradiance of  $\mathbf{P}_x, \mathbf{P}_y$  can be denoted as  $\mathbf{E}_x$  and  $\mathbf{E}_y$ . A key advantage of the proposed BTF is that it  
183 leverages guide images' irradiance  $\mathbf{E}_y$  to generate an implicit representation of exposure ratio. This  
184 not only enables flexible control over the enhancement process of  $\mathbf{E}_x$  but also enhances robustness  
185 when degraded images exhibit domain shift. To construct this high-quality implicit representation,  
186 we develop a contrastive learning-based auto-encoder (CAE) and a dual-branch contrastive learning  
187 strategy—distinct from conventional approaches to enhance the stability of the learning process and  
188 yield highly discriminative features.

189 The detailed elaboration of our dual-branch contrastive learning algorithm is presented in Fig-  
190 ure 2(a). In the  $\mathcal{X}$  branch, the query sample  $\mathbf{h}$  and positive sample  $\mathbf{h}^+$  are both randomly cropped  
191 from  $\mathbf{E}_x$ , while negative samples  $\mathbf{h}_i^-$  (where  $i \in \{1, 2, \dots\}$ ) are image patches randomly cropped  
192 from  $\mathbf{E}_y$ . And the  $\mathcal{Y}$  branch adopts the reverse configuration. The query sample  $\mathbf{s}$  and positive  
193 sample  $\mathbf{s}^+$  are both randomly cropped from  $\mathbf{E}_y$ , while negative samples  $\mathbf{s}_i^-$  (where  $i \in \{1, 2, \dots\}$ )  
194 are image patches randomly cropped from  $\mathbf{E}_x$ . Utilizing the aforementioned random patches, we  
195 can derive the latent feature of them:

$$196 \quad \{h_j/s_j\}_{j=1}^4 = E_C(\mathbf{h}/\mathbf{s}), \quad \{\bar{h}_j/\bar{s}_j\}_{j=1}^4 = E_C(\mathbf{h}^+/\mathbf{s}^+), \quad \{\tilde{h}_j^i/\tilde{s}_j^i\}_{j=1}^4 = E_C(\mathbf{h}_i^-/\mathbf{s}_i^-) \quad (6)$$

197 We can derive the contrastive loss term as follows.

$$198 \quad \mathcal{L}_{\text{info}} = \sum_{j=1}^4 \sum_{i=1}^N \mathbb{E}[\mathcal{L}_{\text{NCE} \Rightarrow \mathcal{X}}(h_j, \bar{h}_j, \tilde{h}_j^i) + \mathcal{L}_{\text{NCE} \Rightarrow \mathcal{Y}}(s_j, \bar{s}_j, \tilde{s}_j^i)] \quad (7)$$

199 where  $\mathcal{L}_{\text{NCE} \Rightarrow \mathcal{X}}(h_j, \bar{h}_j, \tilde{h}_j^i) = -\log \frac{\sigma(h_j, \bar{h}_j)}{\sigma(h_j, \bar{h}_j) + \sum_i \sigma(h_j, \tilde{h}_j^i)}$

200 The final training loss can be formulated as  $\mathcal{L}_{\text{CAE}} = \mathcal{L}_{\text{info}} + \mathcal{L}_{\text{re}}$  where  $\mathcal{L}_{\text{re}} = \|\mathbf{E}_x - \widehat{\mathbf{E}}_x\|_1 +$   
201  $\|\mathbf{E}_y - \widehat{\mathbf{E}}_y\|_1$  where  $\widehat{\mathbf{E}}_x, \widehat{\mathbf{E}}_y$  represent the reconstructed images of  $\mathbf{E}_x, \mathbf{E}_y$  through  $E_C$ , respectively.

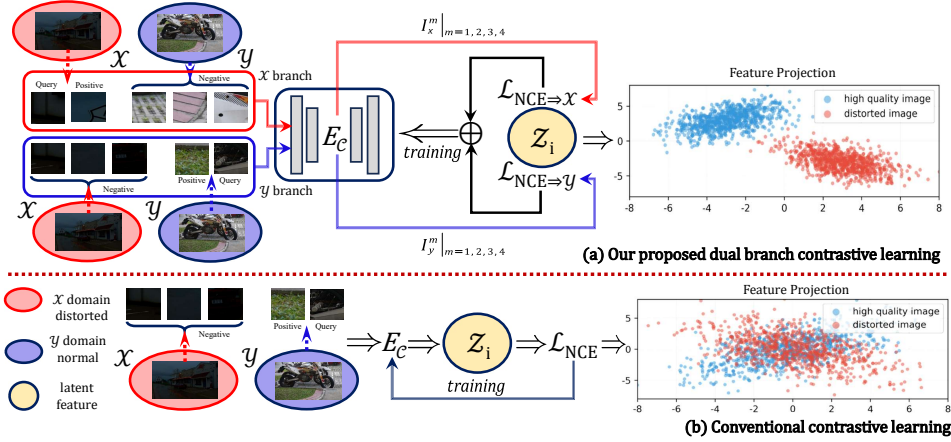

Figure 2: Comparisons of our proposed dual branch contrastive learning and conventional contrastive learning

**Theorem 2.** The gradient of the contrastive loss term defined in Eq.(7) with respect to the trainable parameters  $\theta$  of the contrastive encoder  $E_C$  can be decomposed as:

$$\nabla_{\theta} \mathcal{L}_{\text{info}} = \frac{1}{\tau} \mathbb{E} \left[ (1 - p(z^+)) \cdot J_{\theta}^{\top}(z^+) z - \sum_{i=1}^K p(z_i^-) \cdot J_{\theta}^{\top}(z_i^-) z \right] \quad (8)$$

where  $z$  denotes the feature representation of the query samples,  $z^+$  denotes the feature representation of the positive sample, and  $\{z_i\}_{i=1}^K$  denote the feature representations of the negative samples. For the sake of simplicity, we denote  $z^+$  as  $z_{K+1}$ . All features are normalized onto the unit hypersphere:  $\|z\| = \|z^+\| = \|z_i\| = 1$ .  $p(z^+) = \frac{\exp(z^{+\top} z / \tau)}{\sum_{i=1}^{K+1} \exp(z_i^{\top} z / \tau)}$  stand for the probability that the positive sample is selected, and  $p(z_i^-) = \frac{\exp(z_i^{-\top} z / \tau)}{\sum_{i=1}^{K+1} \exp(z_i^{\top} z / \tau)}$  is the probability that the  $i$ -th negative sample is selected.  $J_{\theta}(z^+) = \frac{\partial z^+}{\partial \theta}$  is the Jacobian matrix of the positive sample features, and  $J_{\theta}(z_i^-) = \frac{\partial z_i^-}{\partial \theta}$  is the Jacobian matrix of the  $i$ -th negative sample features.

**Proof:** The proof can be seen in **Appendix**.

Define the change in the inner product after updating the parameter  $\theta$  as  $\frac{\partial}{\partial \eta} \langle z^+(\theta + \eta v), z \rangle_{\eta=0}$ , where  $v = (1/\tau) \mathbb{E}[(1 - p(z^+)) J_{\theta}^{\top}(z^+) z]$ . Then it can be derived that

$$\begin{aligned} \frac{\partial}{\partial \eta} \langle z^+, z \rangle_{\eta=0} &= \left\langle \frac{\partial z^+}{\partial \eta}, z \right\rangle = \langle J_{\theta}(z^+) v, z \rangle = \langle J_{\theta}(z^+) \mathbb{E}(1 - p(z^+)) J_{\theta}^{\top}(z^+) z, z \rangle \\ &= \mathbb{E} z^{\top} J_{\theta}(z^+) (1 - p(z^+)) J_{\theta}^{\top}(z^+) z = \mathbb{E} (1 - p(z^+)) \|J_{\theta}^{\top}(z^+) z\|^2 \geq 0 \end{aligned} \quad (9)$$

Thus, updating the parameter along this direction will necessarily increase the inner product  $\langle z^+, z \rangle$ . Moreover, since all features are normalized to the unit hypersphere, an increase in the inner product is equivalent to a decrease in distance, i.e.,  $z^+$  approaches  $z$ . Similarly, it can be derived that after updating the parameter  $\theta$ , the inner product  $\langle z_i^-, z \rangle$  decreases, and their mutual distance increases.

### 2.3.2 ADAPTIVE FEATURE DISTRIBUTION MATCHING

To characterize the implicit expression of exposure ratio, we propose a AFDM module that can match the eCDFs of multi-level features extracted by CAE. As implied by its name, Sort-Matching algorithm operates through the alignment of two sorted vectors  $x, y$ . ( $x : \tau = (\tau_1, \dots, \tau_n)$ ,  $y : \tau = (\varpi_1, \dots, \varpi_n)$ ). The  $\{x_{\tau_i}\}_{i=1}^n$  and  $\{y_{\varpi_i}\}_{i=1}^n$  can be regarded as the sorted values of  $x$  and  $y$  in ascending order. It means that  $x_{\tau_1} = \min x$ ,  $x_{\tau_n} = \max x$ ,  $x_{\tau_i} < x_{\tau_j}$  if  $i < j$ .  $\{y_{\varpi_i}\}_{i=1}^n$  is

270 similarly defined. The output  $p$  of Sort-Matching can be defined as  $p_{\tau_i} = y_{\varpi_i}$  where  $p_{\tau_i}$  stand for  
 271 the  $i$ -th element of  $p$ .

272 We propose AFDM to perform exact eCDFs matching on the basis of Sort-Matching. To enable the  
 273 gradient back-propagation in deep models, we modify the calculation method of Sort-Matching as  
 274 follows.

$$275 I_{xy}^m : o_{\tau_i}^m = \chi_{\tau_i}^m + \rho_m \Upsilon_{\varpi_i}^m - \rho_m \langle \chi_{\tau_i}^m \rangle, \rho_m = E_{\mathcal{A}}(I_x^m, I_y^m), m = 1, 2, 3, 4 \quad (10)$$

276 where  $\langle \bullet \rangle$  represents the stop-gradient operation.  $I_x^m, I_y^m$  denote the  $m$ -th level feature of im-  
 277 age  $E_x$  and  $E_y$  extracted by the CAE.  $[\chi_1^m, \chi_2^m, \dots, \chi_n^m]$  stand for the 1D vector flatten by feature  
 278  $\{I_x^m\}_{m=1,2,3,4}$ .  $[\Upsilon_1^m, \Upsilon_2^m, \dots, \Upsilon_n^m]$  is the 1D vector flatten by feature  $\{I_y^m\}_{m=1,2,3,4}$ . The pseudo  
 279 code of AFDM is shown in **Appendix, Algorithm. 1**.

## 282 2.4 LOSS FUNCTION

283 Our proposed method must adhere to physical constraints during the enhanced image generation  
 284 process. Specifically, the semantic content of the enhanced image must remain consistent with that  
 285 of the source image. Thus, we design a semantic consistency loss defined as  $L_c = \sum_{m=1}^4 \|I_q^m -$   
 286  $I_{xy}^m\|_2^2$ , where  $\{I_q^m\}_{m=1,2,3,4} = E_C(f(\mathbf{E}_x))$ .

287 To enable guide images to exert control over the image enhancement process and thereby facilitate  
 288 domain generalization, we develop a multi-scale InfoNCE loss that maximizes mutual information  
 289 between the feature distributions of the guide image and the output enhancement across different  
 290 abstraction levels. Considering a query sample  $\mathcal{H}$  that is cropped from enhanced result, its positive  
 291 sample is  $\mathcal{H}^+$  is randomly cropped from  $\mathbf{E}_y$ , while negative samples  $\mathcal{H}^- = \{\mathcal{H}_k^-\}_{k=1,2,\dots}$  are  
 292 patches cropped from  $\mathbf{E}_x$ . The InfoNCE loss can be formulated as follows.

$$293 L_{mu} = \sum_{i=1}^4 \mathbb{E}(\mathcal{L}_{\text{NCE}}(I_{\mathcal{H}}^i, I_{\mathcal{H}^+}^i, I_{\mathcal{H}^-}^i)) \quad (11)$$

294 where  $I_{\mathcal{H}}^i, I_{\mathcal{H}^+}^i, I_{\mathcal{H}_k^-}^i$  stand for the level  $i$  feature of the corresponding images ( $\mathcal{H}, \mathcal{H}^+, \mathcal{H}_k^-$ ) extracted  
 295 by CAE  $E_C$ .

296 **Theorem 3.** *Minimizing the InfoNCE loss defined in Eq.(11) is equivalent to maximizing the mutual*  
 297 *information  $I(I_{\mathcal{H}}^i, I_{\mathcal{H}^+}^i)$  between the representations  $I_{\mathcal{H}}^i$  and  $I_{\mathcal{H}^+}^i$ .*

298 **Proof:** The proof is provided in **Appendix**.

299 Complementing the generalization of guide features, we introduce a relative adversarial loss  
 300  $L_{adv}$  Jolicoeur-Martineau (2018); Mao et al. (2017) that enforce local detail authenticity. The loss  
 301 function for optimizing BTF is thus written as  $\mathcal{L}_{\text{BTF}} = \lambda_c L_c + \lambda_{mu} L_{mu} + \lambda_{adv} L_{adv}$ .

302 The pseudocode for the complete training pipeline of the model is provided in the **Appendix**.

## 303 3 EXPERIMENT

### 304 3.1 UNDERWATER ROBOTIC VISION: PERCEPTION ENHANCEMENT

305 To validate the generalization capability of the proposed method in unknown underwater environ-  
 306 ments, we integrate the proposed CRM into the shore-based processing system of a bridge under-  
 307 water structural inspection robot. The CRM is employed to enhance the underwater optical images  
 308 transmitted by the robot, thereby improving its visual perception capabilities.

309 The underwater robot is equipped with a Sony IMX335 image sensor housed in a watertight enclo-  
 310 sure to capture optical images of submerged bridge piers. The acquired images are then transmitted  
 311 to the shore-based processing center via a fiber-optic umbilical cable. The shore-based processing  
 312 center is equipped with an NVIDIA RTX 4090 GPU (16GB VRAM) to serve as the computa-  
 313 tional hardware for executing the proposed algorithm. The BTF training weights are set to  $\lambda_c = 2$ ,  
 314  $\lambda_{mu} = 1$ ,  $\lambda_{adv} = 2$ (Our experimental scenario is shown in Figure 12, Appendix)

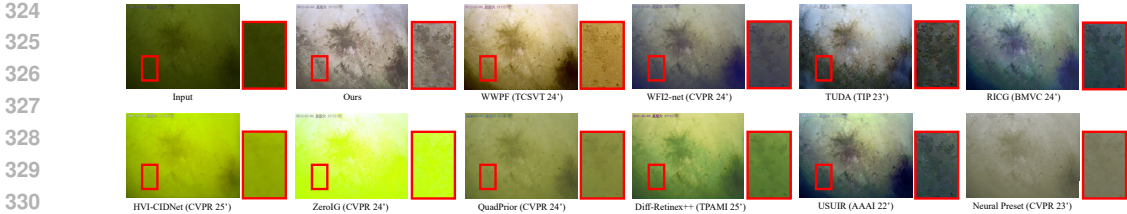

Figure 3: Enhancement results of optical images for underwater bridge pier structures I

Table 1: Quantitative comparison of combined low-light and underwater image enhancement methods. Each UIE algorithm is evaluated in two processing orders: LLIE→UIE and UIE→LLIE (pink).

| Metric  | HVI-CIDNet |          |       |       | QuadPrior |          |       |       | ZeroIG |          |       |       | Diff-Retinex++ |          |       |       | Ours         | RICG  | NPreset |
|---------|------------|----------|-------|-------|-----------|----------|-------|-------|--------|----------|-------|-------|----------------|----------|-------|-------|--------------|-------|---------|
|         | WWPF       | WF12-net | TUDA  | USUIR | WWPF      | WF12-net | TUDA  | USUIR | WWPF   | WF12-net | TUDA  | USUIR | WWPF           | WF12-net | TUDA  | USUIR |              |       |         |
| UCIQE ↑ | 0.492      | 0.489    | 0.534 | 0.508 | 0.516     | 0.477    | 0.472 | 0.488 | 0.445  | 0.466    | 0.503 | 0.492 | 0.526          | 0.549    | 0.568 | 0.545 | <b>0.687</b> | 0.554 | 0.629   |
|         | 0.541      | 0.552    | 0.528 | 0.509 | 0.581     | 0.573    | 0.579 | 0.552 | 0.456  | 0.469    | 0.511 | 0.527 | 0.602          | 0.636    | 0.638 | 0.619 |              |       |         |
| UIQM ↑  | 3.492      | 3.117    | 3.825 | 3.712 | 4.114     | 4.206    | 4.188 | 4.003 | 2.973  | 3.026    | 3.084 | 3.141 | 4.107          | 4.226    | 4.338 | 4.255 | <b>5.462</b> | 4.671 | 4.928   |
|         | 4.129      | 4.083    | 4.338 | 4.262 | 4.562     | 4.583    | 4.669 | 4.413 | 3.266  | 3.260    | 3.311 | 3.308 | 4.886          | 4.757    | 5.026 | 4.926 |              |       |         |
| CCF ↑   | 23.19      | 22.63    | 22.91 | 21.08 | 25.01     | 25.88    | 26.33 | 24.27 | 20.16  | 19.83    | 22.34 | 22.08 | 24.88          | 25.91    | 26.02 | 25.98 | <b>33.13</b> | 30.85 | 31.73   |
|         | 25.73      | 24.98    | 25.01 | 24.11 | 27.32     | 26.68    | 27.79 | 26.13 | 21.84  | 22.93    | 23.18 | 21.98 | 26.03          | 28.83    | 29.14 | 27.70 |              |       |         |
| US ↑    | 2.17       | 2.23     | 2.05  | 1.82  | 2.44      | 2.59     | 2.58  | 2.20  | 1.22   | 1.09     | 2.08  | 1.91  | 2.47           | 2.51     | 2.61  | 2.60  | <b>2.83</b>  | 2.26  | 2.55    |
|         | 2.29       | 2.26     | 2.19  | 1.89  | 2.53      | 2.65     | 2.63  | 2.50  | 1.31   | 1.29     | 1.45  | 1.33  | 2.53           | 2.61     | 2.68  | 2.62  |              |       |         |

The process begin with the calibration of the CRF for the IMX335 image sensor using our proposed method. Subsequently, unsupervised training of the BTF is conducted using a hybrid dataset of singularly degraded images, formed by combining the SICE dataset Cai et al. (2018) and the LOLv1 dataset Wei et al. (2018). To ensure a fair comparative evaluation, and given that real-world underwater images suffer from concurrent degradations of low light and color cast, our method is compared against the following approaches: a standalone low-light image enhancement algorithm, a standalone underwater image enhancement algorithm, and a combined low-light and underwater enhancement approach. This combined approach encompasses two distinct processing sequences: 1) low-light enhancement followed by color cast correction, and 2) color cast correction followed by low-light enhancement. We evaluate our CRM against those following algorithms: 1) Low-Light Enhancement: **HVI-CIDNet** Yan et al. (2025), **Diff-Retinex++** Yi et al. (2025), **Zero-IG** Shi et al. (2024), **QuadPrior** Wang et al. (2024a), 2) Underwater Enhancement: **WWPF** Zhang et al. (2024), **WF12-net** Zhao et al. (2024), **TUDA** Wang et al. (2023), **USUIR** Fu et al. (2022). 3) Joint Enhancement: **Neural Preset** Ke et al. (2023), **RICG** Mao & Cui (2024). The visualization results of the comparative experiment for the single algorithms are shown in Figure 3.

As standalone algorithms underperform significantly relative to the CRM, Table 1 summarizes no-reference image quality metrics (UCIQE Yang & Sowmya (2015), UIQM Panetta et al. (2015), CCF Wang et al. (2018) and user study (US)) for enhancement results achieved by combined approaches. The US recruit 29 participants to conduct independent evaluations of enhanced images’ visual quality. Each participant received training prior to assessment, focusing on three critical dimensions: 1) presence of over-exposure, under-exposure, or over-enhancement phenomena; 2) introduction of color distortion; and 3) existence of unnatural textures or significant noise artifacts. Visual quality ratings are assessed using a 5-point scale (1-5).

Through visual inspection of the enhanced results in Figure 3 and Table 1, it can be observed that the UIE algorithms demonstrate strong capabilities in correcting color casts but exhibits limited effectiveness in improving overall brightness to restore details in dark regions. In contrast, the LLIE algorithms excel in illumination enhancement but performs poorly in color correction. Only our proposed method can simultaneously address multiple degradation issues while maintaining end-to-end image enhancement, yielding the best visual quality for enhanced images. The enhancement results of the combined methods are shown in **Appendix**, Figure 10 and Figure 11.

### 3.2 EXPERIMENTS ON PUBLIC BENCHMARKS

To demonstrate the proposed method’s diverse domain generalization capabilities, this section employs a publicly available dense fog image dataset for testing and validation. The CRM configuration

and parameter settings for testing remain consistent with the subsection 3.1. This experiment utilizes 150 low-light foggy images from RESIDE dataset Li et al. (2018).

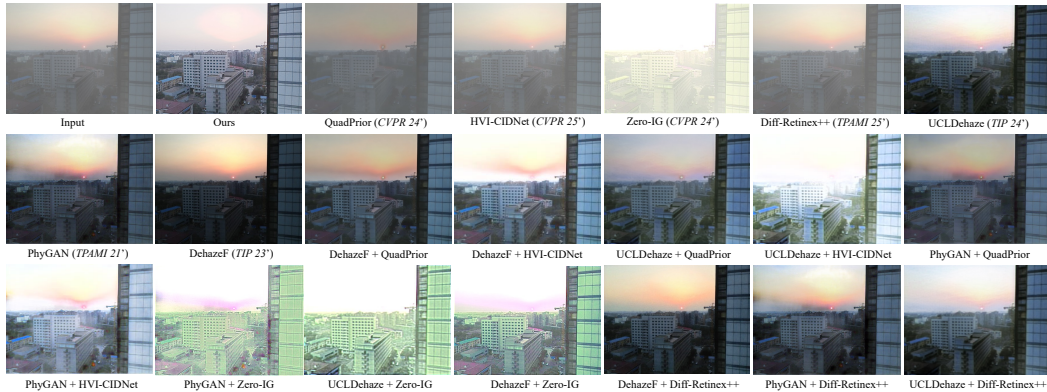

Figure 4: Visualization results on RESIDE dataset Li et al. (2018)

Table 2: Quantitative comparison of combined LLIE and dehazing methods (RESIDE dataset Li et al. (2018)). Each dehazing algorithm is evaluated in two processing orders: LLIE→dehazing and dehazing→LLIE (pink).

| Metric  | HVI-CIDNet |         |           | QuadPrior |         |           | ZeroIG |         |           | Diff-Retinex++ |         |           | Ours         |
|---------|------------|---------|-----------|-----------|---------|-----------|--------|---------|-----------|----------------|---------|-----------|--------------|
|         | PhyGAN     | DehazeF | UCLDehaze | PhyGAN    | DehazeF | UCLDehaze | PhyGAN | DehazeF | UCLDehaze | PhyGAN         | DehazeF | UCLDehaze |              |
| LPIPS ↓ | 0.525      | 0.462   | 0.459     | 0.451     | 0.428   | 0.438     | 0.610  | 0.564   | 0.579     | 0.468          | 0.442   | 0.393     | <b>0.324</b> |
|         | 0.493      | 0.436   | 0.448     | 0.462     | 0.398   | 0.411     | 0.581  | 0.559   | 0.573     | 0.435          | 0.428   | 0.376     |              |
| SSIM ↑  | 0.671      | 0.694   | 0.638     | 0.653     | 0.722   | 0.728     | 0.423  | 0.468   | 0.443     | 0.682          | 0.733   | 0.749     | <b>0.801</b> |
|         | 0.693      | 0.725   | 0.674     | 0.705     | 0.738   | 0.752     | 0.428  | 0.464   | 0.430     | 0.719          | 0.746   | 0.753     |              |
| MUSIQ ↑ | 29.97      | 33.69   | 35.33     | 32.86     | 36.55   | 38.27     | 27.19  | 31.22   | 30.50     | 34.84          | 39.68   | 40.11     | <b>45.62</b> |
|         | 32.89      | 35.57   | 35.62     | 34.16     | 38.86   | 39.78     | 28.81  | 31.14   | 30.89     | 37.73          | 40.26   | 41.23     |              |
| US ↑    | 2.03       | 2.73    | 2.69      | 1.98      | 2.26    | 2.29      | 1.34   | 1.92    | 1.43      | 2.29           | 2.86    | 2.90      | <b>3.58</b>  |
|         | 2.24       | 2.86    | 2.89      | 2.13      | 2.57    | 2.74      | 1.32   | 1.89    | 1.44      | 2.36           | 3.01    | 2.94      |              |

We select three state-of-the-art defogging baseline algorithms (**PhyGAN** Pan et al. (2021), **DehazeF** Song et al. (2023), **UCLDehaze** Wang et al. (2024b)) and four state-of-the-art low-light enhancement algorithms (**HVI-CIDNet** Yan et al. (2025), **Diff-Retinex++** Yi et al. (2025), **Zero-IG** Shi et al. (2024), **QuadPrior** Wang et al. (2024a)) for comparison with our method. As shown in the Figure 4, a major drawback of conventional end-to-end methods is their inability to simultaneously address multiple factors such as dense fog, low contrast, and low light conditions that degrade image quality. The majority of combined algorithms, specifically cascaded models, fail to suppress artifact generation and exhibit poor enhancement performance. This is reflected in the quantitative metrics presented in Table 2. Our method outperforms cascaded enhancement models across all evaluation criteria.

### 3.3 CROSS-DEVICE DOMAIN GENERALIZATION

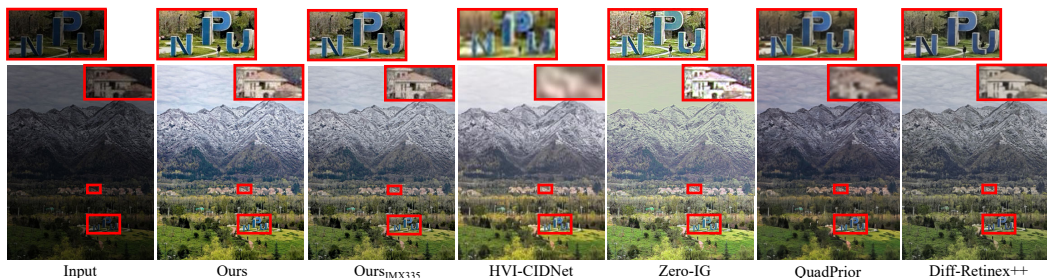

Figure 5: Visualization results on cross-device domain generalization

To evaluate our method’s ability to generalize across device domains, we design a dedicated validation experiment. In this experiment, aerial photography is conducted using a DJI Air 3S, with

the captured images serving as test samples for the augmentation experiments. We denote the CRM formed by combining the CRF calibrated using the IMX335 with the BTF from the previous sections as  $CRM_{IMX335}$ . The model combining the CRF calibrated using the DJI Air 3S camera with the pre-trained BTF is denoted as  $CRM_H$ . As shown in the Figure 5, both  $CRM_H$  and  $CRM_{IMX335}$  effectively restore color and texture details in low-light images. Even when directly utilizing  $CRM_{IMX335}$ , it successfully achieves cross-device domain migration. More cross-device domain generalization visualization results of  $CRM_{IMX335}$  are shown in Figures 17-Figure 18.

### 3.4 ABLATION STUDY

The ablation studies are conducted on the UIEB dataset Li et al. (2019), L2UWE Porto Marques et al. (2019) (underwater), RESIDE dataset Li et al. (2018) (hazy).

#### 3.4.1 IMPACTS OF DUAL BRANCH CONTRASTIVE LEARNING AND BTF LOSS

To evaluate the impact of the dual-branch contrastive learning strategy of  $E_C$  and the training loss term  $L_{mu}$  on the model’s domain generalization capability, we conduct the following ablation studies: 1) We train the CAE using a conventional contrastive learning strategy; 2) We remove the loss term  $L_{mu}$  from the BTF objective function. The resulting models are denoted as *w/o dual* and *w/o  $L_{mu}$* , respectively. The experimental results are shown in Figure 6. The experimental results in Figure 6 (a) and (c) demonstrate that the CRM method incorporating dual-branch contrastive learning achieves lower KL divergence between the enhanced images and the target domain images in RGB kernel density plots, compared to the ablation variant without the dual-branch strategy. This confirms its superior domain generalization performance. The t-SNE visualization in Figure 6(b) demonstrates distinct feature distributions under different mutual information constraints. Guide image features exhibit tight clustering, while enhanced result’s features with  $L_{mu}$  align closer to the guide distribution, suggesting effective mutual information retention. In contrast, features without this loss form a separate cluster with greater dispersion. The 95% confidence ellipses and centroid connectors quantitatively reinforce this spatial relationship.

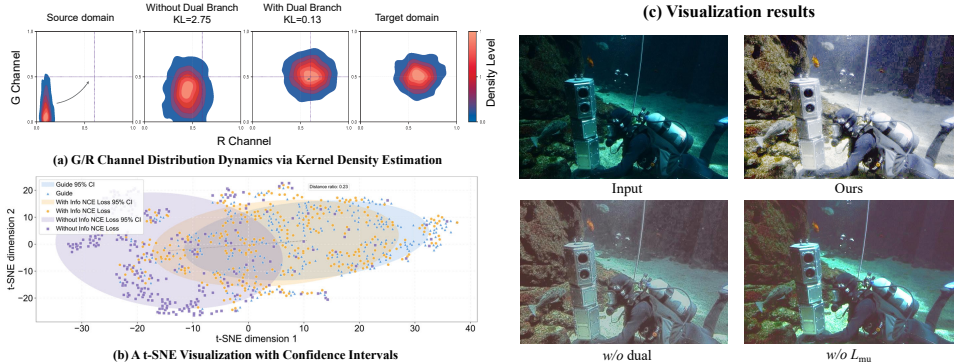

Figure 6: Ablation study on dual-branch contrastive learning and loss  $L_{mu}$

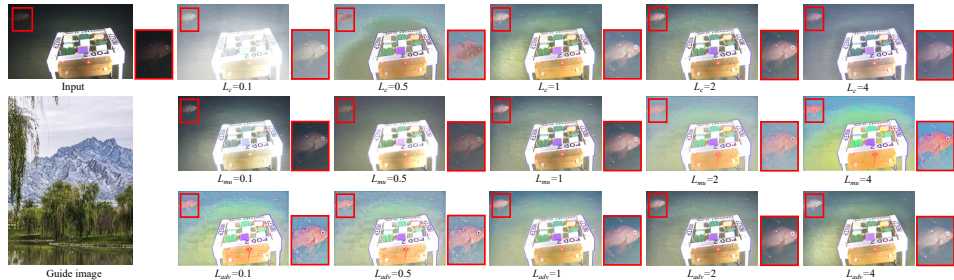

Figure 7: Sensitivity analysis of loss term weight parameters in BTF

We also conduct an ablation analysis on the parameter sensitivities of each loss term in the BTF loss function. In this experiment, we keep the weighting parameters for two loss terms at their final set

486 values while varying the weighting parameter for the third loss term to 0.1, 0.5, 1, 2, and 4. The  
 487 specific experimental results are shown in Figure 7. The experimental results indicate that the  $L_c$   
 488 is most sensitive to the weight parameters. An excessively low value leads to loss of detail in recon-  
 489 structed images, while an excessively high value impairs the guiding role of the other two loss terms  
 490 in model training, hindering the restoration of dark region features. The sensitivity of  $L_{mu}$  is rela-  
 491 tively low in the low-weight parameter range. When the weighting parameter exceeds 1, sensitivity  
 492 gradually increases. As mentioned earlier, an excessively low lambda value reduces the controlla-  
 493 bility of the guidance image during the enhancement process, while an excessively high value may  
 494 cause the tone of the guidance image to adversely affect the enhanced image. The sensitivity to  $L_{adv}$   
 495 is relatively the lowest, yet its impact remains significant. An excessively low value leads to overly  
 496 saturated generated images lacking realism, while an excessively high value compromises  $L_c$  and  
 497 generates artifacts. Additionally, we present the SSIM and LPIPS scores for the UIEB dataset under  
 498 different weight parameter values in **Appendix** Table 2. This further demonstrates that the model  
 499 trained with  $L_c = 2, L_{mu} = 1, L_{adv} = 2$  achieves the optimal performance.

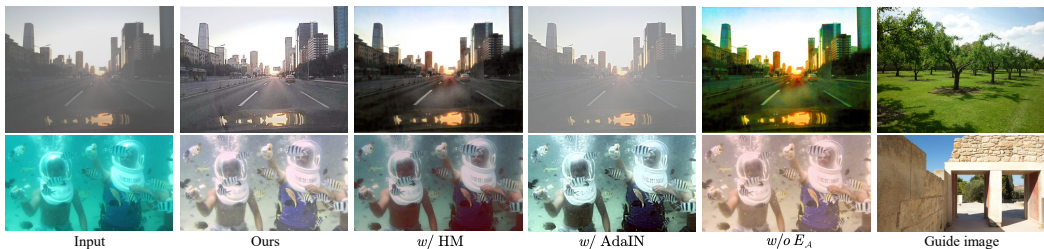

509 Figure 8: Ablation study on Adaptive Feature Distribution Matching

### 511 3.4.2 IMPACTS OF ADAPTIVE FEATURE DISTRIBUTION MATCHING

512 Another essential component of the BTF is the AFDM module, which consists of the Sort-Matching  
 513 and the encoder  $E_A$  that generates adaptive factors. Therefore, it is necessary to conduct ablation  
 514 studies on both of these elements. In this ablation study, we employ the AdaIN and the histogram  
 515 matching (HM) method to replace the Sort-Matching for generating mixed features. The resulting  
 516 models are denoted as  $w/$  AdaIN and  $w/$  HM, respectively. Meanwhile, we remove the encoder  $E_A$ ,  
 517 causing the AFDM to fully reduce to the traditional Sort-Matching, and denote the resulting trained  
 518 model as  $w/o E_A$ . As demonstrated in Figure 8, the output weighting coefficients  $\rho_m$  generated  
 519 by  $E_A$  endow AFDM with fundamentally distinct characteristics compared to conventional Sort-  
 520 Matching algorithms. Notably, removing  $E_A$  reduces AFDM to traditional Sort-Matching, which  
 521 undesirably amplifies the tonal influence of guide images on enhancement results.

522 Real-world data often exhibits substantial deviations from the Gaussian distribution. Consequently,  
 523 achieving accurate feature distribution alignment through AdaIN becomes challenging. As illus-  
 524 trated in Figure 8, the enhancement results produced by the  $w/$  AdaIN fail to effectively handle  
 525 the multiple degradations induced by domain shift, demonstrating restoration capability only for  
 526 individual degradation types. As HM assumes a continuous feature distribution, the presence of  
 527 repeated feature values in those generated by  $E_C$  significantly undermines its accuracy in matching  
 528 the eCDFs. Furthermore, as can be observed from the results in Figure 8, although the  $w/$  HM  
 529 successfully coordinates and addresses the multiple degradations caused by domain shift, its visual  
 530 quality is also significantly compromised due to the presence of abundant artifacts.

## 532 4 CONCLUSION

533  
534 We propose a physics-guided dynamic enhancement framework. Our approach develops a  
 535 Transformer-based Dynamic CRF with cross-device irradiance calibration, synergized with an  
 536 AFDM that embeds contrastive learning based multi-scale exposure awareness. This architecture  
 537 enables implicit exposure ratio estimation by matching eCDFs of arbitrary style references via our  
 538 CAE, achieving device-agnostic enhancement without manual parameter tuning. Extensive exper-  
 539 iments demonstrate our method’s superior cross-domain robustness, outperforming state-of-the-art  
 methods on unseen scenarios while preserving natural visual fidelity.

## REFERENCES

- 540  
541  
542 Bolun Cai, Xiangmin Xu, Kui Jia, Chunmei Qing, and Dacheng Tao. Dehazenet: An end-to-end  
543 system for single image haze removal. *IEEE transactions on image processing*, 25(11):5187–  
544 5198, 2016.
- 545 Jianrui Cai, Shuhang Gu, and Lei Zhang. Learning a deep single image contrast enhancer from  
546 multi-exposure images. *IEEE Transactions on Image Processing*, 27(4):2049–2062, 2018.
- 547 Yuanhao Cai, Hao Bian, Jing Lin, Haoqian Wang, Radu Timofte, and Yulun Zhang. Retinexformer:  
548 One-stage retinex-based transformer for low-light image enhancement. In *Proc. IEEE/CVF Int.*  
549 *Conf. Comput. Vis. (ICCV)*, pp. 12504–12513, 2023.
- 551 Hang Dong, Jinshan Pan, Lei Xiang, Zhe Hu, Xinyi Zhang, Fei Wang, and Ming-Hsuan Yang.  
552 Multi-scale boosted dehazing network with dense feature fusion. In *Proceedings of the IEEE/CVF*  
553 *conference on computer vision and pattern recognition*, pp. 2157–2167, 2020.
- 554 Zhenqi Fu, Huangxing Lin, Yan Yang, Shu Chai, Liyan Sun, Yue Huang, and Xinghao Ding. Unsu-  
555 pervised underwater image restoration: From a homology perspective. In *Proc. AAAI Conf. Artif.*  
556 *Intell.*, volume 36, pp. 643–651, 2022.
- 557 Michael D Grossberg and Shree K Nayar. Determining the camera response from images: What is  
558 knowable? *IEEE Transactions on pattern analysis and machine intelligence*, 25(11):1455–1467,  
559 2003.
- 561 Chunle Guo, Chongyi Li, Jichang Guo, Chen Change Loy, Junhui Hou, Sam Kwong, and Runmin  
562 Cong. Zero-reference deep curve estimation for low-light image enhancement. In *Proceedings of*  
563 *the IEEE/CVF conference on computer vision and pattern recognition*, pp. 1780–1789, 2020.
- 564 Xiaojie Guo, Yu Li, and Haibin Ling. Lime: Low-light image enhancement via illumination map  
565 estimation. *IEEE Transactions on image processing*, 26(2):982–993, 2016.
- 567 Jonathan Ho, Ajay Jain, and Pieter Abbeel. Denoising diffusion probabilistic models. *Advances in*  
568 *neural information processing systems*, 33:6840–6851, 2020.
- 569 Berthold Horn. *Robot vision*. MIT press, 1986.
- 571 Junhui Hou, Zhiyu Zhu, Junhui Hou, Hui Liu, Huanqiang Zeng, and Hui Yuan. Global structure-  
572 aware diffusion process for low-light image enhancement. *Proc. Adv. Neural Inf. Process. Syst.*  
573 *(NIPS)*, 36, 2024.
- 574 Md Jahidul Islam, Youya Xia, and Junaed Sattar. Fast underwater image enhancement for improved  
575 visual perception. *IEEE Robotics and Automation Letters*, 5(2):3227–3234, 2020.
- 577 Hai Jiang, Ao Luo, Haoqiang Fan, Songchen Han, and Shuaicheng Liu. Low-light image enhance-  
578 ment with wavelet-based diffusion models. *ACM Trans. Graph.*, 42(6):1–14, 2023.
- 579 Hai Jiang, Ao Luo, Xiaohong Liu, Songchen Han, and Shuaicheng Liu. Lightendiffusion: Unsu-  
580 pervised low-light image enhancement with latent-retinex diffusion models. In *Proc. Eur. Conf.*  
581 *Comput. Vis. (ECCV)*, 2024a.
- 582 Hai Jiang, Ao Luo, Xiaohong Liu, Songchen Han, and Shuaicheng Liu. Lightendiffusion: Unsuper-  
583 vised low-light image enhancement with latent-retinex diffusion models. In *European Conference*  
584 *on Computer Vision*, pp. 161–179. Springer, 2024b.
- 586 Yifan Jiang, Xinyu Gong, Ding Liu, Yu Cheng, Chen Fang, Xiaohui Shen, Jianchao Yang, Pan Zhou,  
587 and Zhangyang Wang. Enlightengan: Deep light enhancement without paired supervision. *IEEE*  
588 *transactions on image processing*, 30:2340–2349, 2021.
- 589 Alexia Jolicoeur-Martineau. The relativistic discriminator: a key element missing from standard  
590 gan. *arXiv preprint arXiv:1807.00734*, 2018.
- 592 Zhanghan Ke, Yuhao Liu, Lei Zhu, Nanxuan Zhao, and Rynson WH Lau. Neural preset for color  
593 style transfer. In *Proceedings of the IEEE/CVF conference on computer vision and pattern recog-*  
*niton*, pp. 14173–14182, 2023.

- 594 Boyi Li, Xiulian Peng, Zhangyang Wang, Jizheng Xu, and Dan Feng. Aod-net: All-in-one dehazing  
595 network. In *Proceedings of the IEEE international conference on computer vision*, pp. 4770–  
596 4778, 2017.
- 597  
598 Boyi Li, Wenqi Ren, Dengpan Fu, Dacheng Tao, Dan Feng, Wenjun Zeng, and Zhangyang Wang.  
599 Benchmarking single-image dehazing and beyond. *IEEE Transactions on Image Processing*, 28  
600 (1):492–505, 2018.
- 601  
602 Chongyi Li, Chunle Guo, Wenqi Ren, Runmin Cong, Junhui Hou, Sam Kwong, and Dacheng Tao.  
603 An underwater image enhancement benchmark dataset and beyond. *IEEE transactions on image  
604 processing*, 29:4376–4389, 2019.
- 605  
606 Chongyi Li, Saeed Anwar, Junhui Hou, Runmin Cong, Chunle Guo, and Wenqi Ren. Underwater  
607 image enhancement via medium transmission-guided multi-color space embedding. *IEEE Trans-  
actions on Image Processing*, 30:4985–5000, 2021.
- 608  
609 Chongyi Li, Chun-Le Guo, Man Zhou, Zhexin Liang, Shangchen Zhou, Ruicheng Feng, and  
610 Chen Change Loy. Embedding fourier for ultra-high-definition low-light image enhancement.  
611 In *Proc. Int. Conf. Learn. Represent. (ICLR)*, 2023.
- 612  
613 Jingyun Liang, Jiezhong Cao, Guolei Sun, Kai Zhang, Luc Van Gool, and Radu Timofte. Swinir:  
614 Image restoration using swin transformer. In *Proceedings of the IEEE/CVF international confer-  
ence on computer vision*, pp. 1833–1844, 2021.
- 615  
616 Zhexin Liang, Chongyi Li, Shangchen Zhou, Ruicheng Feng, and Chen Change Loy. Iterative  
617 prompt learning for unsupervised backlit image enhancement. In *Proc. IEEE/CVF Int. Conf.  
618 Comput. Vis. (ICCV)*, pp. 8094–8103, 2023.
- 619  
620 Feifan Lv, Yu Li, and Feng Lu. Attention guided low-light image enhancement with a large scale  
621 low-light simulation dataset. *Int. J. Comput. Vis.*, 129(7):2175–2193, 2021.
- 622  
623 Xiaoqian Lv, Shengping Zhang, Chenyang Wang, Yichen Zheng, Bineng Zhong, Chongyi Li, and  
624 Liqiang Nie. Fourier priors-guided diffusion for zero-shot joint low-light enhancement and de-  
625 blurring. In *Proceedings of the IEEE/CVF Conference on Computer Vision and Pattern Recogni-  
tion*, pp. 25378–25388, 2024.
- 626  
627 Long Ma, Tengyu Ma, Risheng Liu, Xin Fan, and Zhongxuan Luo. Toward fast, flexible, and robust  
628 low-light image enhancement. In *Proceedings of the IEEE/CVF conference on computer vision  
and pattern recognition*, pp. 5637–5646, 2022.
- 629  
630 Ruiqi Mao and Rongxin Cui. Retinex-inspired cooperative game through multi-level feature fusion  
631 for robust, universal image enhancement. In *Proceedings of the British Machine Vision Confer-  
632 ence*, 2024.
- 633  
634 Ruiqi Mao, Rongxin Cui, and Weisheng Yan. Zero-shot illumination adaption for improved real-  
time underwater visual perception. *Expert Systems with Applications*, pp. 126616, 2025.
- 635  
636 Xudong Mao, Qing Li, Haoran Xie, Raymond YK Lau, Zhen Wang, and Stephen Paul Smol-  
637 ley. Least squares generative adversarial networks. In *Proc. IEEE/CVF Int. Conf. Comput. Vis.  
638 (ICCV)*, pp. 2794–2802, 2017.
- 639  
640 William Ross McCluney. *Introduction to radiometry and photometry*. Artech House, 2014.
- 641  
642 Aaron van den Oord, Yazhe Li, and Oriol Vinyals. Representation learning with contrastive predic-  
tive coding. *arXiv preprint arXiv:1807.03748*, 2018.
- 643  
644 Jinshan Pan, Jiangxin Dong, Yang Liu, Jiawei Zhang, Jimmy Ren, Jinhui Tang, Yu-Wing Tai, and  
645 Ming-Hsuan Yang. Physics-based generative adversarial models for image restoration and be-  
646 yond. *IEEE Trans. Pattern Anal. Mach. Intell.*, 43(7):2449–2462, 2021.
- 647  
Karen Panetta, Chen Gao, and Sos Agaian. Human-visual-system-inspired underwater image quality  
measures. *IEEE J. Ocean. Eng.*, 41(3):541–551, 2015.

- 648 Tunai Porto Marques, Alexandra Branzan Albu, and Maia Hoeberechts. A contrast-guided approach  
649 for the enhancement of low-lighting underwater images. *Journal of Imaging*, 5(10):79, 2019.
- 650
- 651 Yurui Ren, Zhenqiang Ying, Thomas H Li, and Ge Li. Lecarm: Low-light image enhancement using  
652 the camera response model. *IEEE Trans. Circuits Syst. Video Technol.*, 29(4):968–981, 2018.
- 653
- 654 Yiqi Shi, Duo Liu, Liguang Zhang, Ye Tian, Xuezhi Xia, and Xiaojing Fu. Zero-ig: zero-shot  
655 illumination-guided joint denoising and adaptive enhancement for low-light images. In *Proceed-*  
656 *ings of the IEEE/CVF conference on computer vision and pattern recognition*, pp. 3015–3024,  
2024.
- 657
- 658 Jiaming Song, Chenlin Meng, and Stefano Ermon. Denoising diffusion implicit models. *arXiv*  
659 *preprint arXiv:2010.02502*, 2020.
- 660
- 661 Yuda Song, Zhuqing He, Hui Qian, and Xin Du. Vision transformers for single image dehazing.  
662 *IEEE Transactions on Image Processing*, 32:1927–1941, 2023.
- 663
- 664 Andreas Themelis and Panagiotis Patrinos. Douglas–rachford splitting and admm for nonconvex  
665 optimization: Tight convergence results. *SIAM Journal on Optimization*, 30(1):149–181, 2020.
- 666
- 667 Wenjing Wang, Huan Yang, Jianlong Fu, and Jiaying Liu. Zero-reference low-light enhancement  
668 via physical quadruple priors. In *Proceedings of the IEEE/CVF conference on computer vision*  
669 *and pattern recognition*, pp. 26057–26066, 2024a.
- 670
- 671 Yan Wang, Na Li, Zongying Li, Zhaorui Gu, Haiyong Zheng, Bing Zheng, and Mengnan Sun. An  
672 imaging-inspired no-reference underwater color image quality assessment metric. *Comput. Elect.*  
673 *Eng.*, 70:904–913, 2018.
- 674
- 675 Yongzhen Wang, Xuefeng Yan, Fu Lee Wang, Haoran Xie, Wenhan Yang, Xiao-Ping Zhang, Jing  
676 Qin, and Mingqiang Wei. Ucl-dehaze: toward real-world image dehazing via unsupervised con-  
677 trastive learning. *IEEE Transactions on Image Processing*, 33:1361–1374, 2024b.
- 678
- 679 Zhengyong Wang, Liquan Shen, Mai Xu, Mei Yu, Kun Wang, and Yufei Lin. Domain adaptation  
680 for underwater image enhancement. *IEEE Trans. Image Process.*, 32:1442–1457, 2023.
- 681
- 682 Chen Wei, Wenjing Wang, Wenhan Yang, and Jiaying Liu. Deep retinex decomposition for low-light  
683 enhancement. *arXiv preprint arXiv:1808.04560*, 2018.
- 684
- 685 Jun Xu, Yingkun Hou, Dongwei Ren, Li Liu, Fan Zhu, Mengyang Yu, Haoqian Wang, and Ling  
686 Shao. Star: A structure and texture aware retinex model. *IEEE Transactions on Image Processing*,  
29:5022–5037, 2020a.
- 687
- 688 Ke Xu, Xin Yang, Baocai Yin, and Rynson WH Lau. Learning to restore low-light images via  
689 decomposition-and-enhancement. In *Proceedings of the IEEE/CVF conference on computer vi-*  
690 *sion and pattern recognition*, pp. 2281–2290, 2020b.
- 691
- 692 Qingsen Yan, Yixu Feng, Cheng Zhang, Guansong Pang, Kangbiao Shi, Peng Wu, Wei Dong, Jinqiu  
693 Sun, and Yanning Zhang. Hvi: A new color space for low-light image enhancement. In *Proc.*  
694 *IEEE/CVF Conf. Comput. Vis. Pattern Recognit. (CVPR)*, pp. 5678–5687, 2025.
- 695
- 696 Miao Yang and Arcot Sowmya. An underwater color image quality evaluation metric. *IEEE Trans.*  
697 *Image Process.*, 24(12):6062–6071, 2015.
- 698
- 699 Shuzhou Yang, Moxuan Ding, Yanmin Wu, Zihan Li, and Jian Zhang. Implicit neural representation  
700 for cooperative low-light image enhancement. In *Proc. IEEE/CVF Int. Conf. Comput. Vis. (ICCV)*,  
701 pp. 12918–12927, October 2023.
- 702
- 703 Xunpeng Yi, Han Xu, Hao Zhang, Linfeng Tang, and Jiayi Ma. Diff-retinex: Rethinking low-light  
704 image enhancement with a generative diffusion model. In *Proc. IEEE/CVF Int. Conf. Comput.*  
705 *Vis. (ICCV)*, pp. 12302–12311, 2023.
- 706
- 707 Xunpeng Yi, Han Xu, Hao Zhang, Linfeng Tang, and Jiayi Ma. Diff-retinex++: Retinex-driven rein-  
708 forced diffusion model for low-light image enhancement. *IEEE Transactions on Pattern Analysis*  
709 *and Machine Intelligence*, 2025.

702 Kai Zhang, Wangmeng Zuo, Yunjin Chen, Deyu Meng, and Lei Zhang. Beyond a gaussian denoiser:  
703 Residual learning of deep cnn for image denoising. *IEEE transactions on image processing*, 26  
704 (7):3142–3155, 2017.

705  
706 Kai Zhang, Wangmeng Zuo, and Lei Zhang. Ffdnet: Toward a fast and flexible solution for cnn-  
707 based image denoising. *IEEE Transactions on Image Processing*, 27(9):4608–4622, 2018.

708 Weidong Zhang, Ling Zhou, Peixian Zhuang, Guohou Li, Xipeng Pan, Wenyi Zhao, and Chongyi  
709 Li. Underwater image enhancement via weighted wavelet visual perception fusion. *IEEE Trans-  
710 actions on Circuits and Systems for Video Technology*, 2024.

711  
712 Zhaoyang Zhang, Yitong Jiang, Jun Jiang, Xiaogang Wang, Ping Luo, and Jinwei Gu. Star: A  
713 structure-aware lightweight transformer for real-time image enhancement. In *Proceedings of the  
714 IEEE/CVF International Conference on Computer Vision*, pp. 4106–4115, 2021.

715  
716 Chen Zhao, Weiling Cai, Chenyu Dong, and Chengwei Hu. Wavelet-based fourier information  
717 interaction with frequency diffusion adjustment for underwater image restoration. In *Proceedings  
718 of the IEEE/CVF Conference on Computer Vision and Pattern Recognition*, pp. 8281–8291, 2024.

719  
720 Dewei Zhou, Zongxin Yang, and Yi Yang. Pyramid diffusion models for low-light image enhance-  
721 ment. *arXiv preprint arXiv:2305.10028*, 2023.

722  
723  
724  
725  
726  
727  
728  
729  
730  
731  
732  
733  
734  
735  
736  
737  
738  
739  
740  
741  
742  
743  
744  
745  
746  
747  
748  
749  
750  
751  
752  
753  
754  
755

|     |                            |                                                                                                   |
|-----|----------------------------|---------------------------------------------------------------------------------------------------|
| 756 | $\mathbf{P}_x$             | Distorted image                                                                                   |
| 757 | $\widehat{\mathbf{P}}_x$   | Enhanced image                                                                                    |
| 758 | $\mathbf{P}_y$             | High-visual-quality image                                                                         |
| 759 | $\mathbf{E}_x$             | Image irradiance of $\mathbf{P}_x$                                                                |
| 760 | $\mathbf{E}_y$             | Image irradiance of $\mathbf{P}_y$                                                                |
| 761 | $\mathcal{X}$              | Distorted domain                                                                                  |
| 762 | $\mathcal{Y}$              | Normal-exposure domain                                                                            |
| 763 | $f$                        | Camera Response Function (CRF)                                                                    |
| 764 | $g$                        | Brightness Transformation Function (BTF)                                                          |
| 765 | $\mathbf{R}_x$             | Reflectance of $\mathbf{P}_x$                                                                     |
| 766 | $\mathbf{L}_x$             | Illumination of $\mathbf{P}_x$                                                                    |
| 767 | $R_i$                      | Reflectance of color patch $i$ in Macbeth ColorChecker                                            |
| 768 | $S_i$                      | Scene radiance of color patch $i$ in Macbeth ColorChecker                                         |
| 769 | $E_i$                      | Image irradiance of color patch $i$ in Macbeth ColorChecker                                       |
| 770 | $\widehat{P}_i$            | Pixel sampling point $i$ on the Macbeth ColorChecker                                              |
| 771 | $\widehat{E}_i$            | Relative irradiance sampling point $i$ on the Macbeth ColorChecker                                |
| 772 | $f_0$                      | Average curve of the DoRF dataset                                                                 |
| 773 | $q_i$                      | The $i$ th basis function from the principal component analysis of the curves in the DoRF dataset |
| 774 | $\mathbf{h}$               | query sample randomly cropped from $\mathbf{E}_x$ during the training cycle of CAE                |
| 775 | $\mathbf{h}^+$             | positive sample randomly cropped from $\mathbf{E}_x$ during the training cycle of CAE             |
| 776 | $\mathbf{h}_i^-$           | The $i$ th negative sample randomly cropped from $\mathbf{E}_y$ during the training cycle of CAE  |
| 777 | $\mathbf{s}$               | query sample randomly cropped from $\mathbf{E}_y$ during the training cycle of CAE                |
| 778 | $\mathbf{s}^+$             | positive sample randomly cropped from $\mathbf{E}_y$ during the training cycle of CAE             |
| 779 | $\mathbf{s}_i^-$           | The $i$ th negative sample randomly cropped from $\mathbf{E}_x$ during the training cycle of CAE  |
| 780 | $\mathcal{H}$              | query sample randomly cropped from enhanced result $\widehat{\mathbf{P}}_x$                       |
| 781 | $\mathcal{H}^+$            | positive sample randomly cropped from $\mathbf{E}_y$ during the training cycle of BTF             |
| 782 | $\mathcal{H}^-$            | negative sample randomly cropped from $\mathbf{E}_x$ during the training cycle of BTF             |
| 783 | $E_C$                      | Contrastive learning-based auto-encoder (CAE)                                                     |
| 784 | $E_A$                      | Encoder in AFDM                                                                                   |
| 785 | $\{I_x^m\}_{m=1,2,3,4}$    | Multi-scale feature of $\mathbf{E}_x$                                                             |
| 786 | $\{I_y^m\}_{m=1,2,3,4}$    | Multi-scale feature of $\mathbf{E}_y$                                                             |
| 787 | $\{I_{xy}^m\}_{m=1,2,3,4}$ | Multi-scale hybrid features of $\mathbf{E}_x$ and $\mathbf{E}_y$ derived from the AFDM module     |
| 788 | $\{I_q^m\}_{m=1,2,3,4}$    | Multi-scale feature of $\mathbf{P}_x$                                                             |

---

## A TRAINING PSEUDO OF CRM

---

### Algorithm 1: Training Pseudo of CRM

---

**Input:** Distorted image dataset  $\mathbf{X}$ , Guide image dataset  $\mathbf{Y}$   
**Output:** CRM Model parameters  $\theta$  (contains parameters of  $E_C$ ,  $E_A$  and generator  $\mathcal{G}$ )

- 1 Calibrate the CRF  $f$  of the robot’s onboard image sensor using Eq.(2) to Eq.(5).;
- 2  $i \leftarrow 1$ ;
- 3 **while**  $\theta$  not converged **do**
- 4     **if**  $i \% 3 \neq 0$  **then**
- 5         Randomly select samples from the datasets  $\mathbf{P}_x \leftarrow \mathbf{X}, \mathbf{P}_y \leftarrow \mathbf{Y}$ ;
- 6         Calculate  $\mathcal{L}_{CAE}$ ;
- 7         Update parameters of the  $E_C$  using *Adam* optimizer;
- 8         Freeze the parameters of  $E_C$ ;
- 9     **else**
- 10         Randomly select samples from the datasets  $\mathbf{P}_x \leftarrow \mathbf{X}, \mathbf{P}_y \leftarrow \mathbf{Y}$ ;
- 11         image irradiance  $\mathbf{E}_x \leftarrow f^{-1}(\mathbf{P}_x), \mathbf{E}_y \leftarrow f^{-1}(\mathbf{P}_y)$ ;
- 12          $\{I_x^m\}_{m=1,2,3,4} = E_C(\mathbf{E}_x), \{I_y^m\}_{m=1,2,3,4} = E_C(\mathbf{E}_y)$ ;
- 13          $\{I_{xy}^m\}_{m=1,2,3,4} = \text{AFDM}(\{I_x^m\}_{m=1,2,3,4}, \{I_y^m\}_{m=1,2,3,4})$ ;
- 14          $\hat{\mathbf{P}}_x \leftarrow f(\mathcal{G}(\{I_{xy}^m\}_{m=1,2,3,4}))$ ;
- 15         Calculate  $L_{\text{BTF}}(\mathbf{P}_x, \hat{\mathbf{P}}_x, \mathbf{P}_y)$ ;
- 16         Update parameters of the  $\mathcal{G}, E_A$  using *Adam* optimizer;
- 17     **end**
- 18      $i \leftarrow i + 1$
- 19 **end**
- 20 **Return**  $\theta$

---

## B FORWARD REASONING IN THE TESTING PHASE OF THE CRM

---

### Algorithm 2: Forward Reasoning of CRM

---

**Input:** Arbitrary distorted image  $\mathbf{P}_x$ , Guide image  $\mathbf{P}_y$   
**Output:** Enhanced image  $\hat{\mathbf{P}}_x$

- 1 Using the inverse function of the CRF  $f$  for a specific camera, input the low-light image  $\mathbf{P}_x$  and guide image  $\mathbf{P}_y$  to obtain their irradiance  $\mathbf{E}_x \leftarrow f^{-1}(\mathbf{P}_x), \mathbf{E}_y \leftarrow f^{-1}(\mathbf{P}_y)$ ;
- 2 Obtain multi-scale features of  $\mathbf{E}_x$  and  $\mathbf{E}_y$  using CAE  $E_C$ ,  $\{I_x^m\}_{m=1,2,3,4} = E_C(\mathbf{E}_x)$ ,  $\{I_y^m\}_{m=1,2,3,4} = E_C(\mathbf{E}_y)$ ;
- 3 Obtain hybrid features  $\{I_{xy}^m\}_{m=1,2,3,4} = \text{AFDM}(\{I_x^m\}_{m=1,2,3,4}, \{I_y^m\}_{m=1,2,3,4})$ ;
- 4 Obtain the enhanced image  $\hat{\mathbf{P}}_x \leftarrow f(\mathcal{G}(\{I_{xy}^m\}_{m=1,2,3,4}))$ ;
- 5 **Return**  $\hat{\mathbf{P}}_x$

---

## C PSEUDO-CODE FOR AFDM

---

### Algorithm 3: Pseudo-code for AFDM

---

**Input:** Features  $\{I_x^m\}_{m=1,2,3,4}$ ,  $\{I_y^m\}_{m=1,2,3,4}$

**Output:** Mixed feature  $\{I_{xy}^m\}_{m=1,2,3,4}$

- 1  $b, c, h, w = I_x^m.shape$ ;
  - 2 Calculate  $\rho_m$  according to Eq.(10);
  - 3  $\rightarrow$ , IndexforE = torch.sort( $I_x^m.view(b, c, -1)$ );
  - 4 SortforZ,  $\_ = torch.sort(I_y^m.view(b, c, -1)$ );
  - 5 IndexforE = IndexforE.argsort(-1);
  - 6  $I_{xy}^m = I_x^m + \rho_m \text{SortforZ.gather}(-1, \text{IndexforE}) - \rho_m I_x^m.detach()$ ;
  - 7 **Return**  $I_{xy}^m.view(b, c, h, w)$
- 

## D RELATED WORK

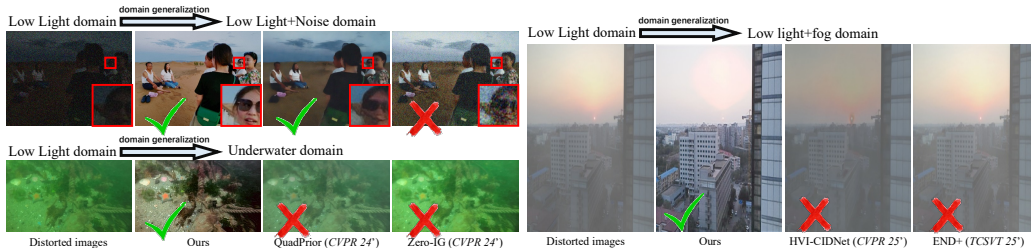

Figure 9: Comparison on domain generalization with a SOTA unsupervised method: Zero-IG Shi et al. (2024), Wang et al. Wang et al. (2024a). All these models are trained on low-light dataset termed LOL Wei et al. (2018). Those three algorithms are generalized in the low-light noise domain, underwater domain, and low-light fog domain. Our model can achieve domain generalization with higher quality than the other two methods.

### D.1 SINGLE DEGRADATION IMAGE ENHANCEMENT

Single degradation image enhancement has advanced through domain-specific physical priors and deep learning integration. In low-light enhancement, Retinex-based decomposition Guo et al. (2016); Xu et al. (2020a) and CNN architectures Wei et al. (2018); Jiang et al. (2021); Liang et al. (2023) address illumination recovery while recent zero-shot methods Guo et al. (2020); Zhang et al. (2021); Ma et al. (2022) optimize without paired data. Underwater restoration combines multi-color space fusion Li et al. (2019; 2021) with real-time designs Islam et al. (2020), whereas denoising leverages residual learning Zhang et al. (2017; 2018) and transformer architectures Liang et al. (2021). Dehazing progresses through atmospheric model reformulation Cai et al. (2016); Li et al. (2017) and multi-scale fusion Dong et al. (2020). However, the practical applicability of these single-degradation image enhancement methods remains limited in real-world engineering scenarios, as natural images often suffer from compounded degradation factors that interact synergistically.

### D.2 CROSS-DOMAIN IMAGE ENHANCEMENT

Recently, many methods have shown impressive performance in cross-domain image enhancement. The Xu et al. (2020b) presents a frequency-aware decomposition-enhancement network that addresses coupled low-light enhancement and noise suppression through layer-specific frequency processing. The Shi et al. (2024) introduces a zero-shot framework for joint low-light enhancement and denoising via illumination-guided physical constraints. The Retinexformer Cai et al. (2023), a one-stage Retinex framework integrating an Illumination-Guided Transformer to jointly address low-light enhancement and noise restoration through non-local interaction modeling. Recent advances in diffusion models Ho et al. (2020); Song et al. (2020) have propelled them to the forefront

918 of image enhancement research. Wang et al. (2024a); Jiang et al. (2024b; 2023); Yi et al. (2023);  
 919 Zhou et al. (2023) all fully leverage the progressive denoising capabilities of diffusion models to  
 920 achieve joint low-light enhancement and denoising. The FourierDiff Lv et al. (2024), a zero-shot  
 921 framework that integrates Fourier-domain priors with pre-trained diffusion models addresses joint  
 922 low-light enhancement and deblurring by decoupling amplitude-phase optimization. In Mao et al.  
 923 (2025); Mao & Cui (2024), the authors develop zero-shot low-light image enhancement methods  
 924 with underwater color cast correction capability. Although the aforementioned methods possess  
 925 certain cross-domain image enhancement capabilities, their applicable scenarios remain predeter-  
 926 mined and cannot fully detach from cross-domain data during model optimization.  
 927  
 928  
 929

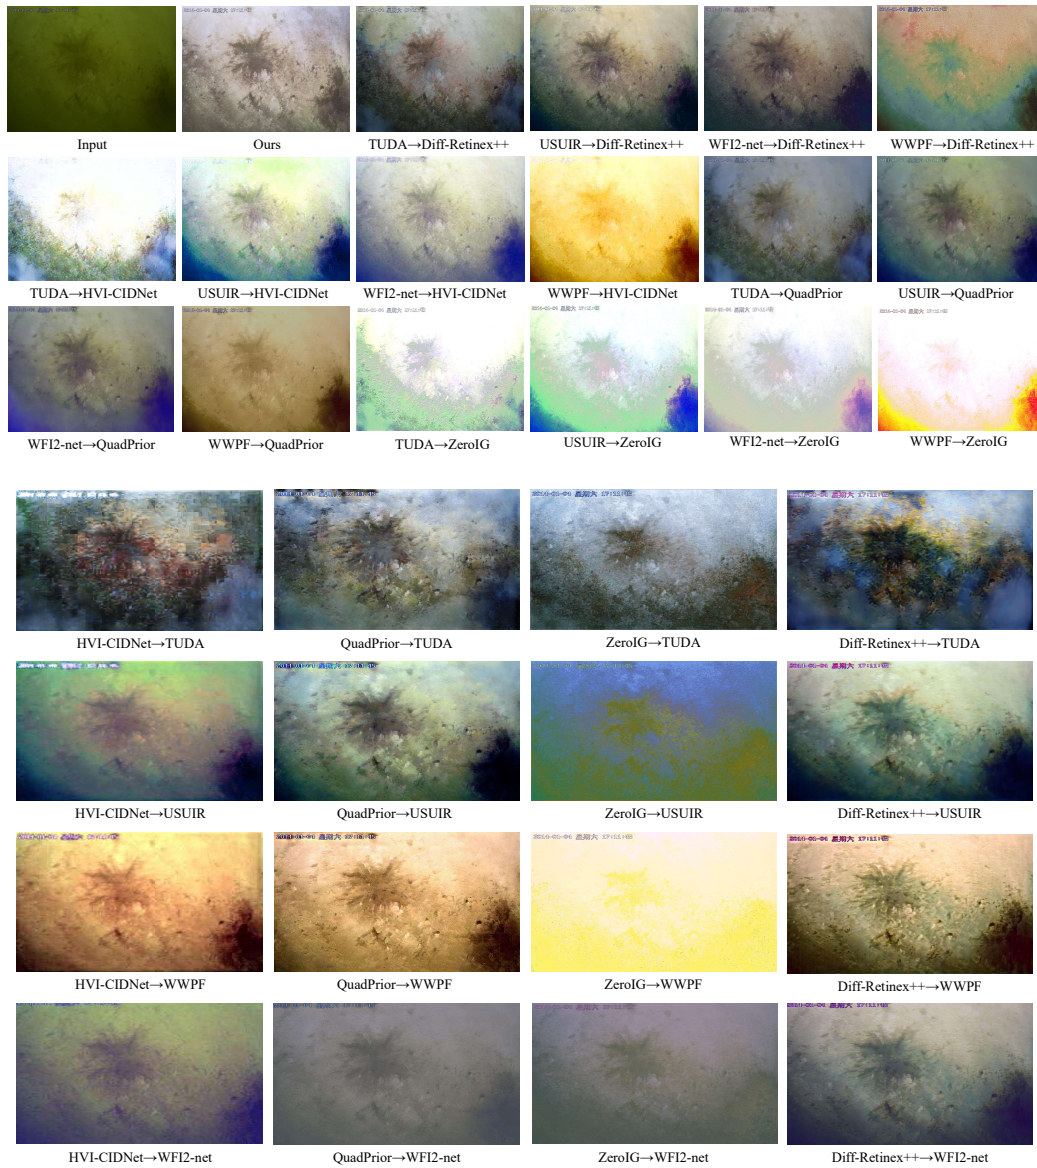

968 Figure 10: Visualization results of combined approaches I  
 969  
 970  
 971

972  
973  
974  
975  
976  
977  
978  
979  
980  
981  
982  
983  
984  
985  
986  
987  
988  
989  
990  
991  
992  
993  
994  
995  
996  
997  
998  
999  
1000  
1001  
1002  
1003  
1004  
1005  
1006  
1007  
1008  
1009  
1010  
1011  
1012  
1013  
1014  
1015  
1016  
1017  
1018  
1019  
1020  
1021  
1022  
1023  
1024  
1025

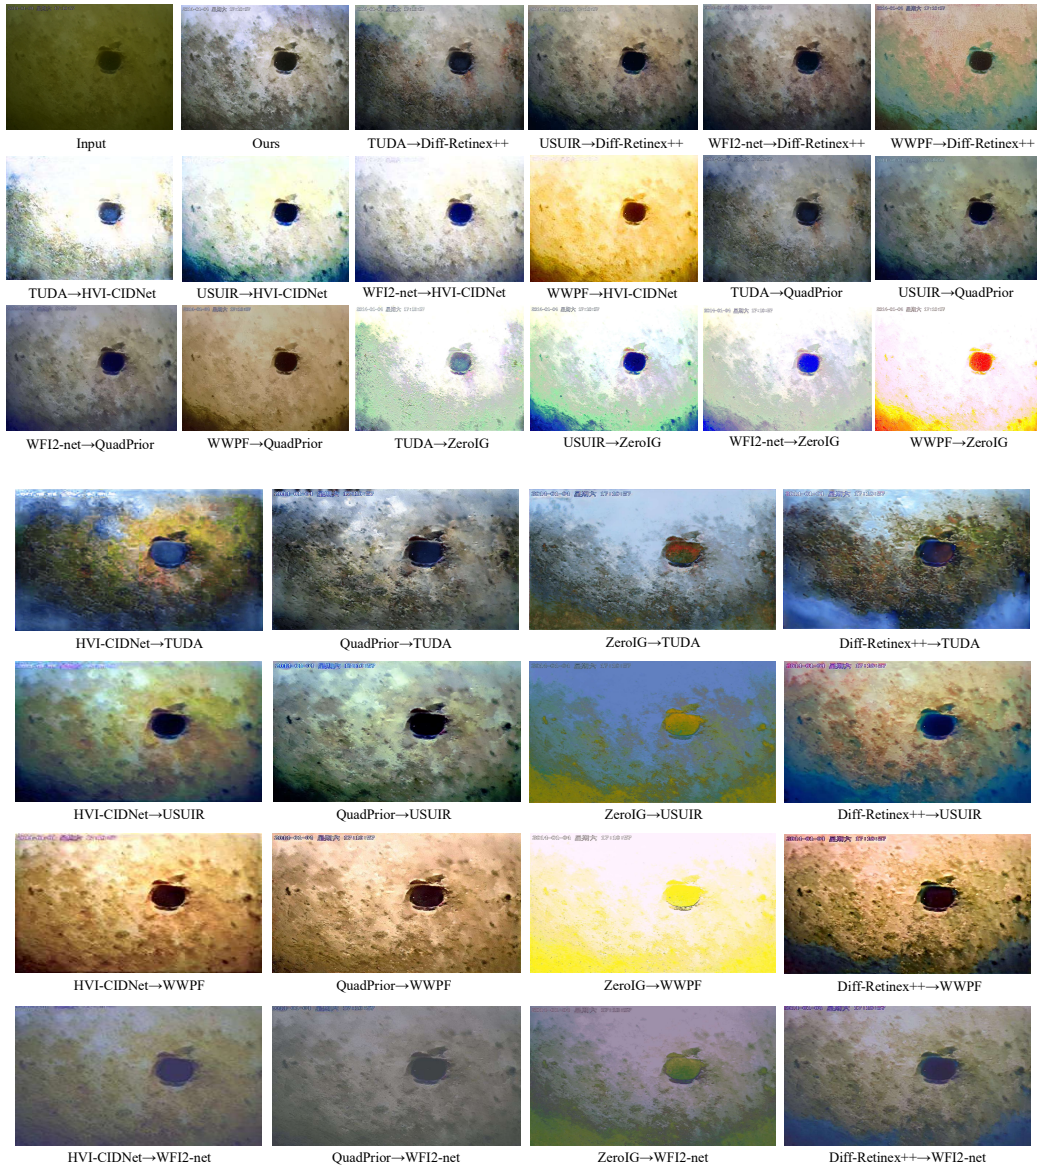

Figure 11: Visualization results of combined approaches II

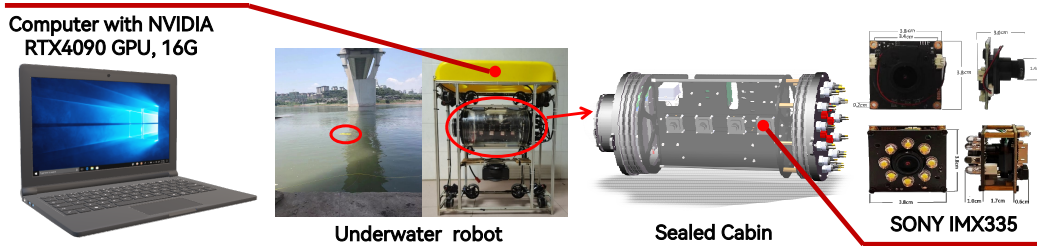

Figure 12: Experiment system of underwater robot

1026  
1027  
1028  
1029  
1030  
1031  
1032  
1033  
1034  
1035  
1036  
1037  
1038  
1039  
1040  
1041  
1042  
1043  
1044  
1045  
1046  
1047  
1048  
1049  
1050  
1051  
1052  
1053  
1054  
1055  
1056  
1057  
1058  
1059  
1060  
1061  
1062  
1063  
1064  
1065  
1066  
1067  
1068  
1069  
1070  
1071  
1072  
1073  
1074  
1075  
1076  
1077  
1078  
1079

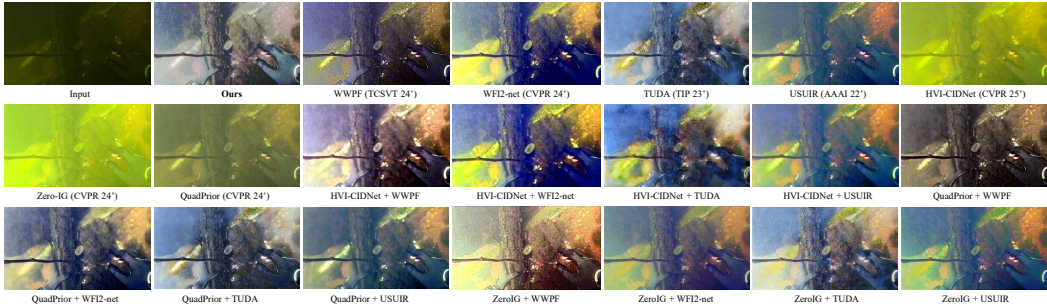

Figure 13: Visualization results on UIEB dataset Li et al. (2019)

## E SUPPLEMENTARY EXPERIMENTAL RESULTS

### E.1 EXPERIMENTAL RESULTS ON UIEB DATASET

This experiment selects 100 low-light underwater images from the UIEB dataset Li et al. (2019) and applies the following two algorithmic approaches for enhancement. The first approach involves single-category enhancement processing, where images are enhanced using either a UIE algorithm or an LLIE algorithm independently. The second approach employs combined enhancement processing, which integrates both UIE and LLIE algorithms to enhance underwater distorted images. We use PSNR, LPIPS, SSIM, MUSIQ, noise level (NL) and US to evaluate the quality of the enhanced results. The scoring criteria for user research and the number of volunteers remain consistent with subsection 3.1. The visual results and quantitative metric evaluations are presented in Figure 13 and Table 3, respectively.

Table 3: Quantitative comparison of combined LLIE and UIE methods (UIEB dataset Li et al. (2019)). Each UIE algorithm is evaluated in two processing orders: LLIE→UIE and UIE→LLIE (pink).

| Metric  | HVI-CIDNet |          |       |       | QuadPrior |          |       |       | ZeroIG |          |       |       | Diff-Retinex++ |          |       |       | Ours         |
|---------|------------|----------|-------|-------|-----------|----------|-------|-------|--------|----------|-------|-------|----------------|----------|-------|-------|--------------|
|         | WWPF       | WF12-net | TUDA  | USUIR | WWPF      | WF12-net | TUDA  | USUIR | WWPF   | WF12-net | TUDA  | USUIR | WWPF           | WF12-net | TUDA  | USUIR |              |
| LPIPS ↓ | 0.493      | 0.582    | 0.558 | 0.481 | 0.429     | 0.460    | 0.553 | 0.497 | 0.621  | 0.518    | 0.635 | 0.686 | 0.477          | 0.496    | 0.508 | 0.520 | <b>0.357</b> |
| SSIM ↑  | 0.682      | 0.562    | 0.702 | 0.670 | 0.749     | 0.737    | 0.728 | 0.681 | 0.658  | 0.675    | 0.640 | 0.621 | 0.674          | 0.711    | 0.705 | 0.686 | <b>0.788</b> |
| MUSIQ ↑ | 40.26      | 39.77    | 38.75 | 35.68 | 43.36     | 40.02    | 39.87 | 39.96 | 33.83  | 37.14    | 35.61 | 34.78 | 44.79          | 43.16    | 42.83 | 42.10 | <b>49.86</b> |
| NL ↓    | 3.828      | 3.269    | 2.165 | 1.853 | 0.983     | 0.916    | 0.983 | 0.937 | 2.262  | 1.792    | 1.753 | 1.827 | 1.168          | 1.204    | 0.997 | 1.257 | <b>0.817</b> |
| US ↑    | 2.52       | 2.51     | 2.36  | 2.19  | 2.68      | 2.79     | 2.82  | 2.44  | 2.08   | 1.93     | 2.47  | 2.40  | 2.71           | 2.78     | 2.83  | 2.77  | <b>3.45</b>  |

Visual experimental results demonstrate that single underwater image enhancement algorithms perform well in correcting underwater color casts, but exhibit limited capability compared to DCRA in addressing feature loss caused by low-light conditions. However, combining LLIE algorithms (e.g., QuadPrior Wang et al. (2024a)) with UIE methods (e.g., HVI-CIDNet Yan et al. (2025), TUDA Wang et al. (2023), and WF12-net Zhao et al. (2024)) significantly improves the visual quality of enhanced images. Nevertheless, compared to the proposed method, these combined approaches still fall short in terms of authenticity preservation and overall aesthetic improvement. The image quality assessment metrics in the Table 1 also demonstrate that proposed method significantly outperforms all combined methods in terms of human visual perception.

### E.2 NOISY LOW LIGHT DOMAIN GENERALIZATION

To investigate the domain generalization capability of the proposed method under low-light noisy conditions, we continue to utilize Sony IMX335 image sensor to construct the CRF and the BTF is trained by a hybrid dataset formed by combining SICE dataset Cai et al. (2018) and LOLv1

dataset Wei et al. (2018). Then we conduct quantitative comparative experiments on visual quality and multi-category evaluation metrics using the **UHD-LL** (ultra-high-definition noisy low-light) dataset Li et al. (2023). In this experiment, we include more LLIE algorithms for comparative analysis with the proposed method, primarily including: **QuadPrior** Wang et al. (2024a), **HVI-CIDNet** Yan et al. (2025), **Diff-Retinex++** Yi et al. (2025), **Zero-IG** Shi et al. (2024), **LightenDiffusion** Jiang et al. (2024a), **GSAD** Hou et al. (2024), **Retinexformer** Cai et al. (2023), **CLIT-LIP** Liang et al. (2023), **NeRCo** Yang et al. (2023), **UHDFour** Li et al. (2023)..

First, visual comparison results are shown in Figure 14. Experimental results demonstrate that both our proposed CRM and the zero-shot learning framework by **QuadPrior** Wang et al. (2024a) exhibit significant advantages in noise suppression. However, by comparing local texture details in regions (c)(d) of Figure 14, **QuadPrior** Wang et al. (2024a) shows oversaturation phenomenon in brightness correction, verifying the superiority of our approach in preserving image naturalness.

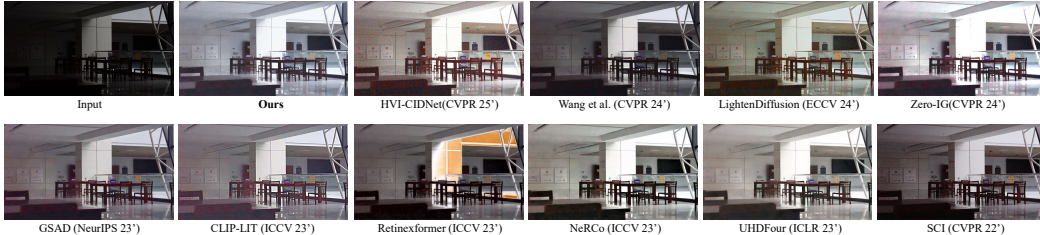

Figure 14: Results on UHD-LL Li et al. (2023)

Table 4: Quantitative Comparative Analysis of State-of-the-Art Methods on the UHD-LL Dataset Li et al. (2023)

|                  | PSNR $\uparrow$ | SSIM $\uparrow$ | LPIPS $\downarrow$ | MSE(%)       | MUSIQ $\uparrow$ |
|------------------|-----------------|-----------------|--------------------|--------------|------------------|
| UHDFour          | 22.19           | 0.860           | 0.208              | 0.303        | 40.55            |
| CLIP-LIT         | 20.85           | 0.831           | 0.219              | 0.277        | 38.88            |
| LightenDiffusion | 22.36           | 0.828           | 0.168              | 0.183        | 39.19            |
| QuadPrior        | 23.76           | 0.843           | 0.144              | 0.112        | 40.87            |
| HVI-CIDNet       | 23.01           | 0.814           | 0.175              | 0.126        | 41.18            |
| Diff-Retinex++   | 22.76           | 0.847           | 0.235              | 0.162        | 37.18            |
| GSAD             | 19.76           | 0.742           | 0.314              | 0.264        | 38.92            |
| Retinexformer    | 20.71           | 0.773           | 0.323              | 0.225        | 38.26            |
| NeRCo            | 23.25           | 0.823           | 0.257              | 0.185        | 41.18            |
| Zero-IG          | 18.82           | 0.703           | 0.337              | 0.296        | 32.19            |
| Ours             | <b>24.78</b>    | <b>0.852</b>    | <b>0.141</b>       | <b>0.083</b> | <b>45.98</b>     |

For quantitative evaluation, we continue to employ PSNR, SSIM, LPIPS, VIF, NL and US for comprehensive analysis. The user study recruited 29 participants for independent visual quality assessment of enhanced images. The scoring criteria for the US are consistent with those described in Section 3.2 of the main text. The statistical distributions and NL metric correlations are visualized in Figure 15. Quantitative results in Table 4 confirm that CRM achieves superior performance in both noise suppression and perceptual quality when enhancing noisy low-light images, outperforming existing methods across all benchmark metrics.

### E.3 BACKLIT ENVIRONMENT DOMAIN GENERALIZATION

The backlit images tested are selected from the real-world dataset BAID380 Liang et al. (2023), with enhancement results shown in Figure 16. Notably, 4K ultra-high-definition images from this dataset

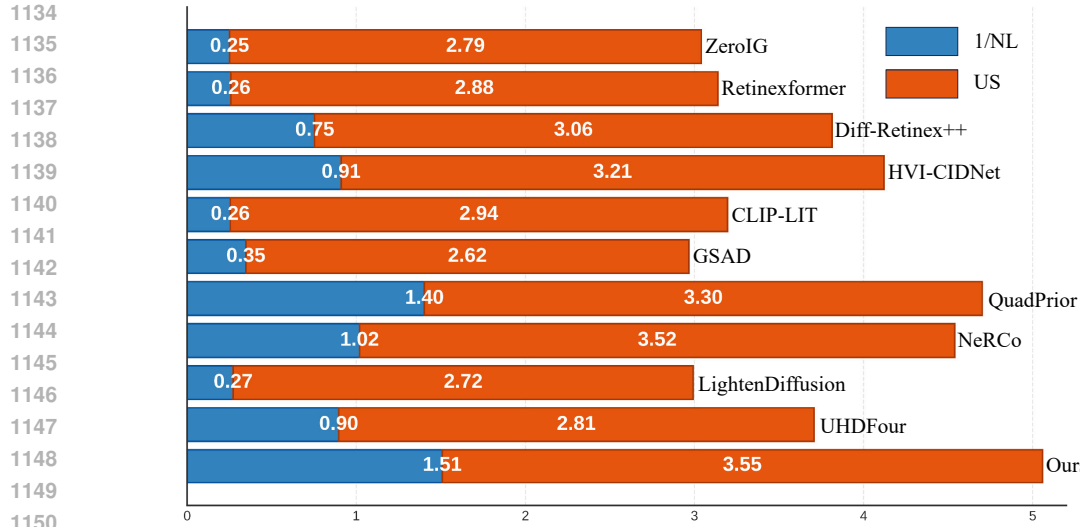

Figure 15: Results on UHD-LL Li et al. (2023)

were chosen as test samples. Experimental results and enlarged regional details demonstrate that the enhanced images generated by our CRM exhibit optimal visual quality. Compared with other algorithms, our method not only effectively improves image brightness but also preserves rich details, while significantly enhancing contrast and mitigating color distortion under backlit conditions.

In comparison, results from **UHDFour** Li et al. (2023) exhibit apparent blurred texture details and overexposure issues, leading to degraded overall image quality. The images generated by **QuadPrior** Wang et al. (2024a) contain severe artifacts coupled with notable underexposure, further diminishing the visual effectiveness of enhancement. Additionally, **CLIP-LIT** Liang et al. (2023) underperforms in local brightness recovery, failing to adequately improve luminance balance and contrast.

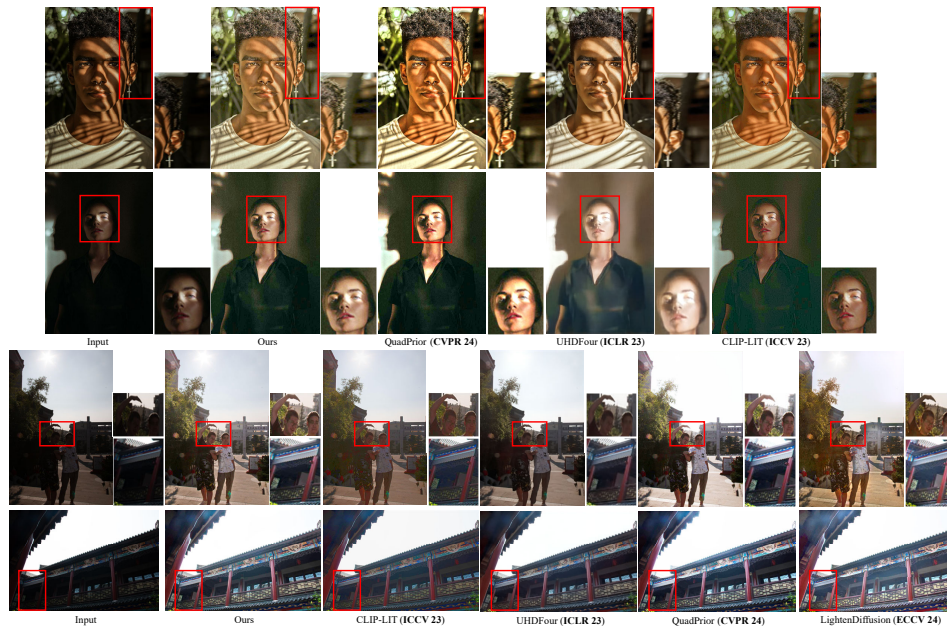

Figure 16: Results on BAID Liang et al. (2023)

The comparative analysis demonstrates that the our CRM effectively reduces overexposure and artifacts while maximally preserving image details under global brightness enhancement. Consequently, our approach demonstrates significant advantages in backlit image enhancement tasks, with generated images outperforming existing state-of-the-art algorithms in visual quality, detail retention, and illumination recovery.

#### E.4 CROSS DEVICE GENERALIZATION EXPERIMENT

In wild environments, optical images are often captured by diverse devices. However, existing image enhancement algorithms are typically trained on data from a single device, leading to poor generalization across different device domains. To address this limitation, we collect several low light images using multiple devices (including Huawei Mate 60 Pro, Samsung Galaxy S25 Ultra, Sony  $\alpha$ 7IV, Canon EOS R5, Nikon Z9) to evaluate the cross device domain generalization capabilities of various algorithms. The implementation configurations for the compared LLIE algorithms and our proposed CRM are kept consistent with those described in subsection 3.1, E.3 and E.2. Visual analytical results are obtained through systematic evaluation of images captured by each camera sensor, with experimental results presented in Figure 17 and Figure 18. Experimental data demonstrate that on three flagship camera platforms (Sony  $\alpha$ 7IV, Canon EOS R5, and Nikon Z9), our method exhibits optimal stability, with a cross device standard deviation of 0.08, significantly surpassing other tested methods.

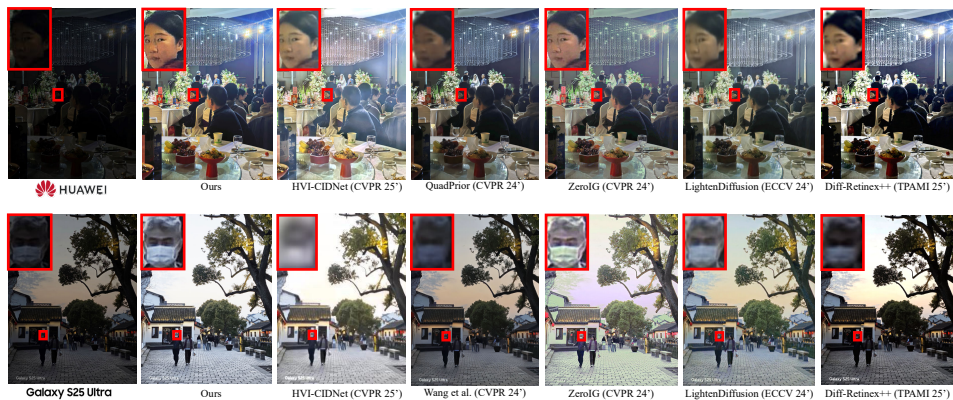

Figure 17: Enhancement Results on Huawei Mate 60pro and Samsung Galaxy S25 Ultra

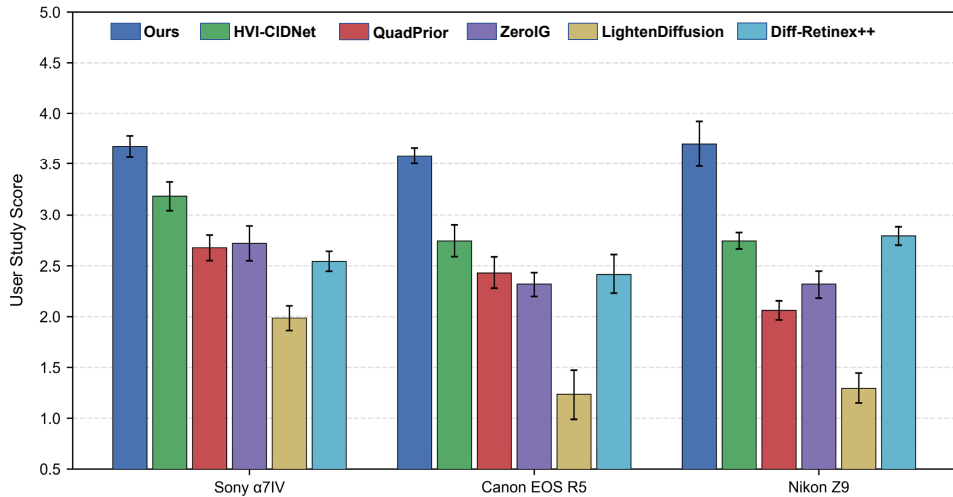

Figure 18: US Scores of Different Algorithms on Images from Different Cameras

E.5 ABLATION STUDY

E.5.1 ABLATION STUDY ON CRF

The ablation study on CRF calibration is divided into two parts. The first part investigate the impact of different CRF curves from DoRF dataset on the enhancement performance of the constructed CRM. The second part examine the importance of the proposed physics based CRF calibration method for obtaining accurate CRF curves. We conduct controlled experiments by selectively applying 6 representative CRFs covering various response characteristics while maintaining identical network architectures and training protocols.

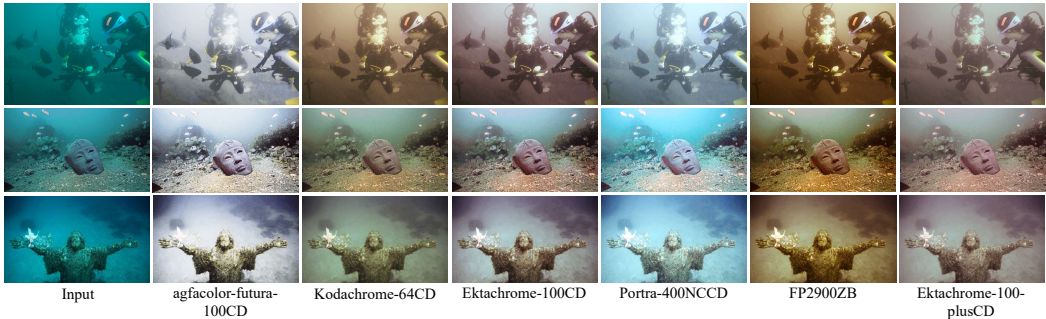

Figure 19: Comparison of enhancement results obtained using different CRFs I

First, the generalization performance experiment in the underwater distortion domain is conducted. The visualized experimental results and the quantitative analysis results are shown in Figure 19 and Table. 5, respectively. Visual comparisons show that the CRM containing agfacolor-futura-100CD’s CRF achieves clearer and more accurate correction of color cast distortion, and exhibits superior overall white balance performance. While maintaining natural gradient transitions, this method demonstrates relatively better texture detail preservation compared to the CRFs of other cameras. The quantitative findings corroborate the visual quality comparisons in Figure 19, demonstrating agfacolor-futura-100CD’s optimal metric performance while maintaining narrow margins over alternative configurations.

Table 5: Performance Comparison of Six CRF Configurations

| CRF Type               | PSNR (dB)   | SSIM         | CIEDE2000  |
|------------------------|-------------|--------------|------------|
| agfacolor-futura-100CD | <b>28.6</b> | <b>0.923</b> | <b>5.4</b> |
| Kodachrome-64CD        | 28.5        | 0.919        | 5.6        |
| Ektachrome-100CD       | 28.3        | 0.917        | 5.7        |
| Portra-400NCCD         | 28.1        | 0.914        | 5.9        |
| FP2900ZB               | 28.0        | 0.912        | 6.1        |
| Ektachrome-100-plusCD  | 27.8        | 0.909        | 6.3        |

The second experiment investigated the generalization capability of models trained with distinct CRF curves from DoRF dataset in low-light noisy domains, utilizing the VV dataset. The comparative results are systematically presented in Figure. 20. Visualization analysis reveals that CRFs exhibit negligible impact on enhancement outcomes for low-illumination noisy domain generalization. While subtle discrepancies in contrast and luminance characteristics persist across configurations, all models achieve consistently satisfactory performance in holistic visual quality restoration.

The third experiment systematically evaluates the cross-domain generalization of models trained with varying CRFs in low-illumination hazy environments. Conducted on the RESIDE benchmark dataset, the comparative performance metrics are quantitatively illustrated in Figure. 21. Experimental results demonstrate consistent efficacy across configurations, where varying CRFs are observed to

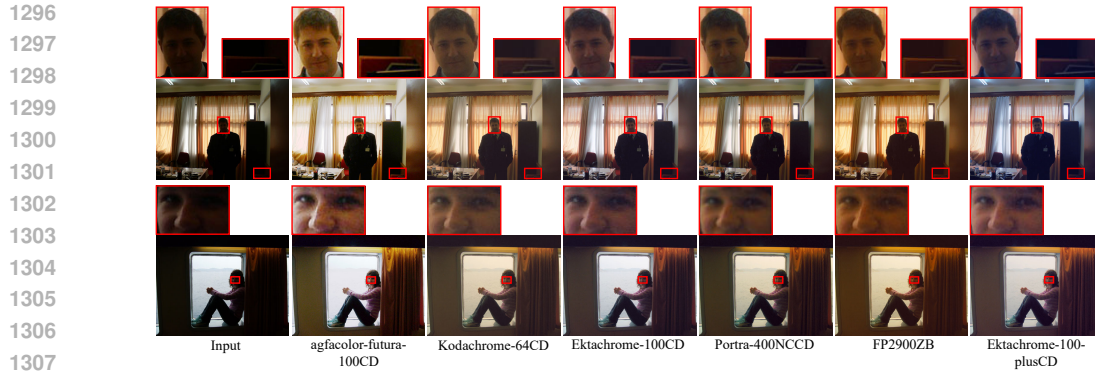

Figure 20: Comparison of enhancement results obtained using different CRFs II

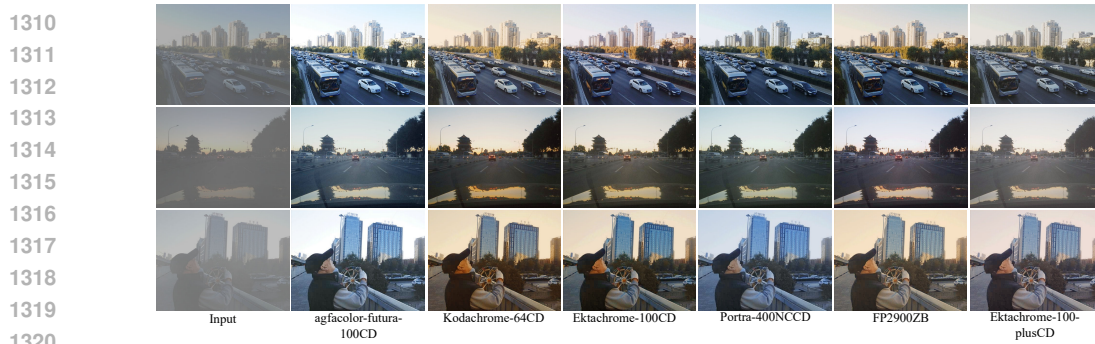

Figure 21: Comparison of enhancement results obtained using different CRFs III

1321  
1322  
1323  
1324  
1325  
1326  
1327

introduce perceptible variations in image stylization while maintaining optimal luminance enhancement and contrast amplification. All models successfully mitigate haze-induced visual degradation, achieving statistically comparable performance metrics as quantified in Figure. 20.

1328  
1329  
1330  
1331  
1332

The second ablation study on CRF aims to analyze the impact of both the physics based prior and the EMA-ADMM optimization algorithm in the proposed calibration method on the final results. To provide a clear and intuitive demonstration of the proposed CRF calibration algorithm, we conduct a CRF calibration experiment using a Sony DXC 9000 industrial camera. The calibration results are presented in Figure 22 and Figure 23.

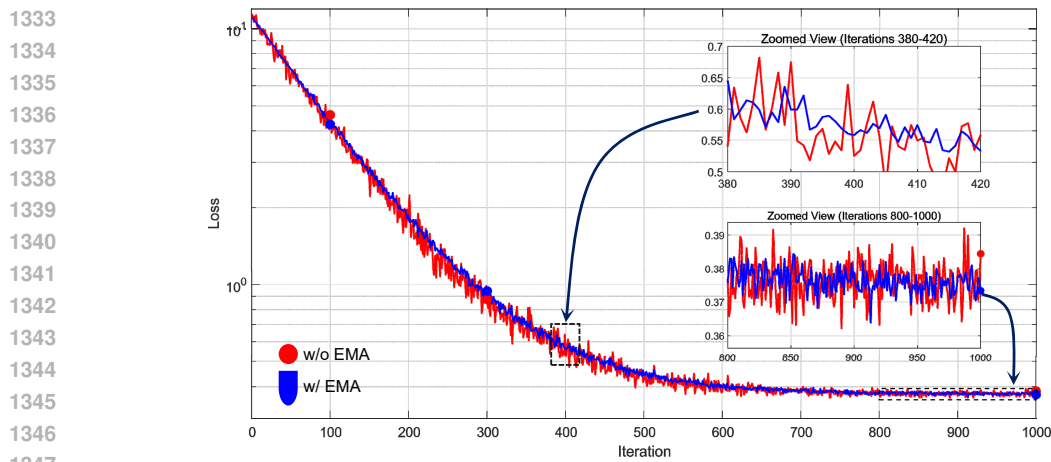

1348  
1349

Figure 22: Impact of the exponential moving average mechanism on solving CRF calibration optimization

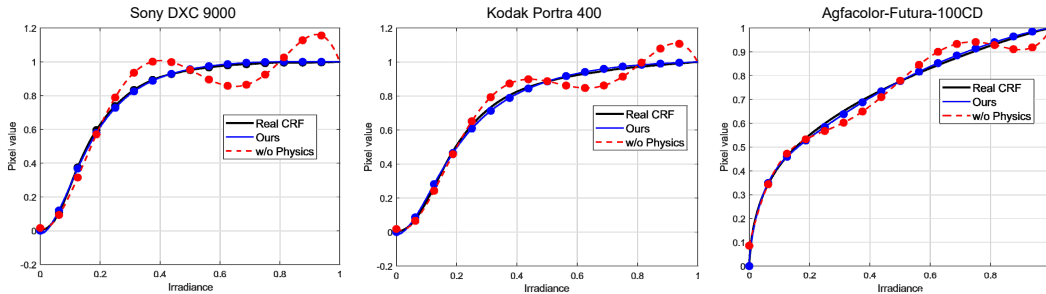

Figure 23: Impact of the physical prior on solving CRF calibration optimization

Figure 22 compares the loss function convergence of EMA-ADMM and traditional ADMM when solving optimization problem Eq.(5). The results clearly demonstrate that the proposed EMA-ADMM algorithm exhibits a significantly more stable optimization process with substantially reduced curve oscillations. Figure 23 presents the ablation study results regarding the proposed physics based prior in CRF calibration. The experiment involves three cameras (a Sony DXC 9000, Kodak Portra 400, and Agfacolor-Futura-100CD) combined with a Macbeth color checker to achieve ground truth CRF calibration. The method from Grossberg & Nayar (2003), which incorporates no physical prior (denoted as *w/o* Physics), is used for comparison. Experimental results demonstrate that the CRF obtained by our method most closely approximates the ground-truth CRF, while the calibration error of *w/o* Physics is significantly higher than that of the proposed approach.

### E.5.2 ABLATION STUDY ON THE CHOICE OF THE DOWNSAMPLING NETWORK IN CAE

The proposed CRM is a flexible low-light image enhancement framework. Its flexibility is not only manifested in the controllability of brightness but also in the fact that users can select pre-trained downsampling networks with different structures for CAE  $E_C$ . To further verify this flexibility, a series of ablation experiments are conducted to test the performance of the model when different downsampling networks are used. Table 6 shows the influence of different downsampling networks on the quality of enhanced images. In this section, several representative downsampling networks are selected for the experiments, among which MobileNet and Inception-ResNet-v2 are the most representative choices.

Table 6: The Influence of Different Downsampling Network Structures on the Efficiency and Performance of the Model (Testing images are selected from BAID dataset Liang et al. (2023))

|                            | PSNR $\uparrow$ | SSIM $\uparrow$ | LPIPS $\downarrow$ | FLOPs(G)    | Pa(M)       | IT(s)         |
|----------------------------|-----------------|-----------------|--------------------|-------------|-------------|---------------|
| <b>MobileNet</b>           | 23.45           | 0.822           | 0.183              | <b>9.46</b> | <b>0.33</b> | <b>0.0362</b> |
| SENet                      | 22.83           | 0.776           | 0.249              | 229.98      | 76.10       | 0.4208        |
| DenseNet                   | 23.04           | 0.781           | 0.251              | 134.16      | 10.21       | 0.1635        |
| <b>Inception-ResNet-v2</b> | <b>23.88</b>    | <b>0.898</b>    | <b>0.143</b>       | 249.63      | 5.19        | 0.2192        |

In application scenarios with high performance requirements, Inception-ResNet-v2 can provide better feature extraction capabilities. Especially in complex scenarios, it can capture more delicate image details and lighting changes. In the task of image enhancement, this network helps to improve the global brightness distribution of the image and retain local details, making it suitable for image enhancement tasks that require high-quality results. However, due to its complex model structure and large computational load, Inception-ResNet-v2 is not very suitable for scenarios with high real-time requirements.

In contrast, MobileNet has become an ideal choice for real-time applications due to its lightweight network structure. In tasks that require efficient processing, MobileNet can significantly reduce the

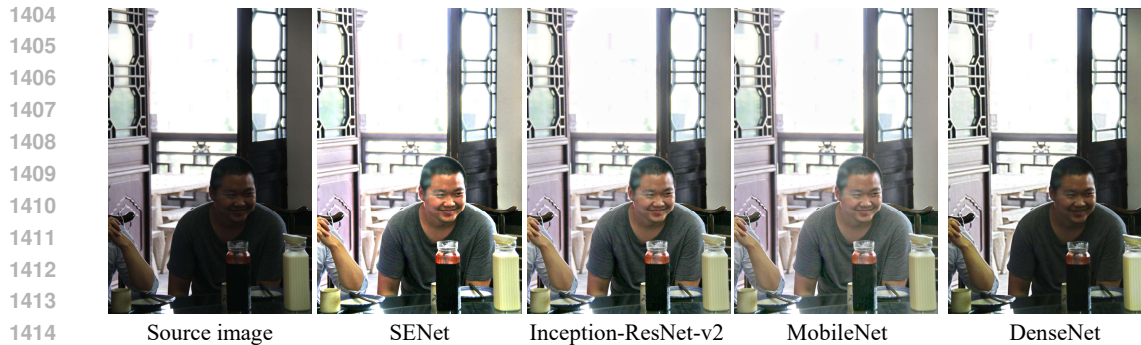

1416 Figure 24: Visualized experimental results of the analysis on the influence of downsampling network  
1417 structures on model performance

1418  
1419  
1420 consumption of computational resources and provide satisfactory image enhancement effects. Al-  
1421 though MobileNet is slightly inferior to Inception-ResNet-v2 in terms of feature expression ability,  
1422 it can still achieve a good performance trade-off in many practical applications, especially when  
1423 deployed on embedded systems or devices with limited resources.

1424 Figure 24 shows the visualized comparison results of using MobileNet and Inception-ResNet-v2 as  
1425 downsampling networks. It can be clearly seen that the enhanced images generated by the models  
1426 using these two networks both reach a high level of visual quality, and can effectively improve  
1427 the brightness, contrast, and detail clarity of the images. This indicates that, whether it is used in  
1428 applications with high-performance requirements or in scenarios with strict real-time requirements,  
1429 the CRM has sufficient flexibility to meet different needs.

### 1430 1431 1432 E.5.3 ANALYSIS OF BRIGHTNESS CONTROL (ABLATION STUDY ON GUIDE IMAGES)

1433  
1434 Our proposed method formulates the image enhancement process through two sequential operations:  
1435 1) irradiance calibration of low-light images via dynamic CRF mapping, followed by 2) implicit  
1436 feature extraction from the guidance image’s exposure rate through the AFDM module. These  
1437 extracted features are subsequently decoded to generate enhanced images that maintain exposure  
1438 consistency with the guide image.

1439 In this ablation experiment, we aim to illustrate the role of our CRM in achieving controllable  
1440 illumination adjustment through three examples. As shown in Figure 25, distinct guide images  
1441 present different hues and exposure levels. These are then input into the BTF to produce the final  
1442 enhanced images. Notably, our CRM effectively transfers the exposure level, instead of the hue,  
1443 from the guide image to the one to be enhanced, enabling the generation of high-quality enhanced  
1444 results with any guide image.

1445 As shown in Figure 25, Figure 26 and Figure 27, we select the images from the SICE dataset Cai  
1446 et al. (2018) and the AGLIE dataset Lv et al. (2021) as input images, and employs the images with  
1447 different brightness levels from the UHD dataset Li et al. (2023) and the SICE dataset Cai et al.  
1448 (2018) as guide images. By observing the result graphs, it can be found that the brightness infor-  
1449 mation of the guide images is successfully transferred to the input images, thus achieving precise  
1450 control over the brightness of the enhanced images. Users can flexibly customize the image bright-  
1451 ness according to their requirements. Compared with the existing enhancement methods, our CRM  
1452 can not only flexibly adjust the brightness but also significantly improve the overall visual quality  
1453 of the images while maintaining the image details. It can be seen from the results in the figures  
1454 that the flexible exposure adjustment ability of our CRM effectively overcomes the limitations of  
1455 the existing methods. Most of the traditional image enhancement methods rely on fixed illumination  
1456 models and cannot adapt to the complex and changeable lighting conditions in real-world scenar-  
1457 ios, especially in extreme environments such as low light and backlight. In contrast, our CRM can  
dynamically adjust the exposure rate, which not only improves the visual quality of the images but  
also significantly enhances the detail retention and exposure balance in different scenarios.

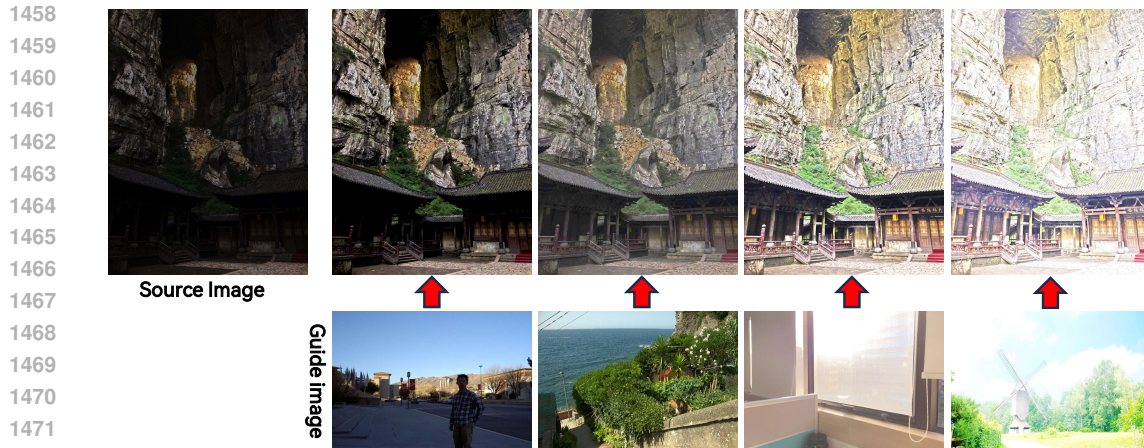

Figure 25: Results of Brightness Control I

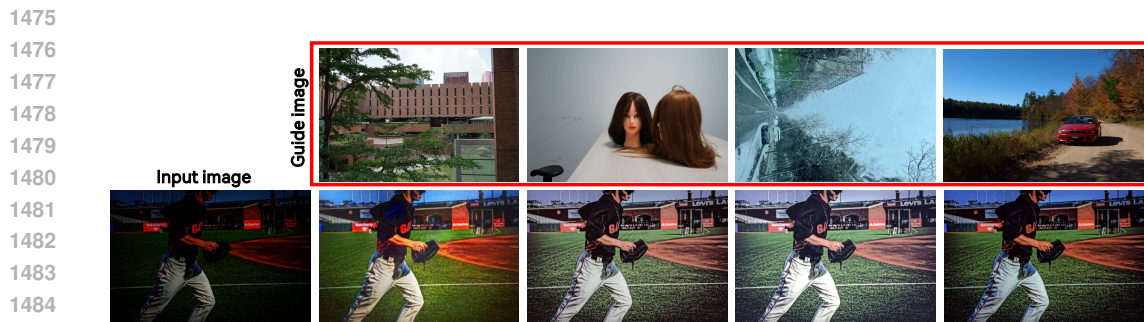

Figure 26: Results of Brightness Control II

1486  
1487  
1488  
1489  
1490  
1491  
1492  
1493  
1494  
1495  
1496  
1497

In addition, by combining FPN with the BTF, our CRM is not only capable of efficiently addressing the issue of color distortion but also demonstrates strong adaptability in adjusting brightness and contrast. This advantage enables it to achieve domain generalization in image enhancement tasks across a variety of complex environments, such as night scenes, low-light scenarios, and underwater images. In these scenarios, the uneven distribution of light and color deviation often lead to the loss of image details or over-enhancement. However, the guiding mechanism and controllable exposure adjustment strategy of our CRM provide powerful solutions in these aspects, significantly improving the overall visual effect and realism of the enhanced images.

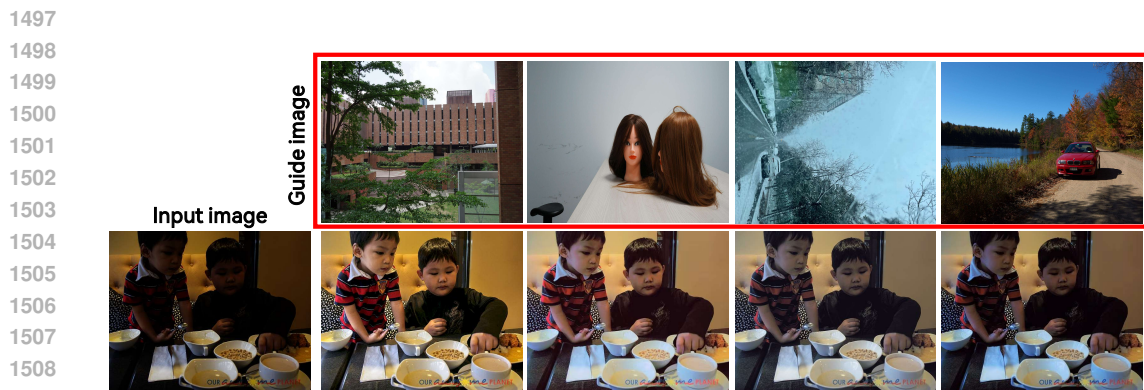

Figure 27: Results of Brightness Control III

1510  
1511

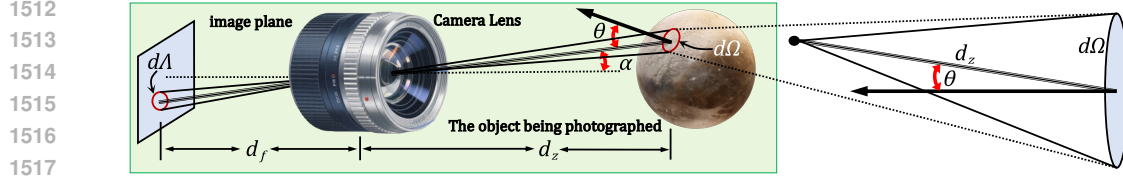

Figure 28: Illustration of solid angle

## F PROOF

### F.1 PROOF OF THEOREM 1

**Definition 1. Solid Angle:** Horn (1986) With the observation point as the center, a unit sphere is constructed; the projected area of any object onto this unit sphere is defined as the solid angle of that object with respect to the observation point (The illustration are presented in Figure 28(b)).

Considering a lens positioned at a distance  $d_f$  from the image plane (shown in Figure 28(b)), a small area  $\delta\Omega$  on the object surface corresponds to an image area  $\delta\Lambda$ . The ray from  $\delta\Omega$  to the center of the lens forms angles  $\alpha$  and  $\theta$  with the optical axis and the surface normal, respectively. The object is located at a distance  $d_z$  in front of the lens. According to Horn (1986), when light passes through the perspective center without refraction, the solid angle of the cone formed by all rays directed toward a small object area is equal to that of the cone formed by all rays directed toward its corresponding image area. According to the definition of solid angle in **Definition 1**, the solid angles of both the image area and the small object area can be derived as follows.

$$\frac{\delta\Lambda \cos \alpha}{(d_f / \cos \alpha)^2} = \frac{\delta\Lambda \cos^3 \alpha}{d_f^2}, \quad \frac{\delta\Omega \cos \theta}{(-d_z / \cos \alpha)^2} = \frac{\delta\Omega \cos \theta \cos^2 \alpha}{d_z^2} \quad (12)$$

Since the right-hand sides of the two equations in Eq.(12) are equal, it can be derived as follows.

$$\frac{\delta\Omega}{\delta\Lambda} = \frac{\cos \theta}{\cos \alpha} \left( \frac{d_z}{d_f} \right)^2 \quad (13)$$

Similarly, the solid angle subtended by the lens as viewed from the small area on the photographed object can be formulated as:  $\Gamma_{lens} = \frac{\pi r^2 \cos \alpha}{(-d_z / \cos \alpha)^2} = \pi \left( \frac{r}{d_z} \right)^2 \cos^3 \alpha$ . Let us define the scene radiance as  $S$  that is the power emitted per unit projected area per unit solid angle from the photographed object. Therefore, the radiant flux passing through the camera lens from  $\delta\Omega$  can be expressed as  $\delta Lens = S \Gamma_{lens} \delta\Omega \cos \theta = \pi S \delta\Omega \left( \frac{r}{d_z} \right)^2 \cos^3 \alpha \cos \theta$ .

Therefore, the irradiance of the image region formed by the light converging from  $\delta\Omega$ , which is the optical power per unit area, can be expressed as:

$$E = \frac{\delta Lens}{\delta\Lambda} = \pi S \frac{\delta\Omega}{\delta\Lambda} \left( \frac{r}{d_z} \right)^2 \cos^3 \alpha \cos \theta = \pi S \left( \frac{r}{d_f} \right)^2 \cos^4 \alpha \quad (14)$$

Based on the derivation of the aforementioned physical equations, to accurately calibrate the non-linear relationship between image irradiance and pixel values, we use an LED panel light and a Macbeth ColorChecker as the fundamental experimental setup. During the experiment, the LED panel is positioned in front of the color chart to ensure it illuminated the entire area with uniform brightness. Due to the uniform brightness in the environment, We can derive the relationship between the irradiances  $E_i, E_j$  of the image regions formed by any two color blocks  $i$  and  $j$  on the

Macbeth ColorChecker, and the scene radiances  $S_i, S_j$ :  $\frac{E_i}{E_j} = \frac{\pi \cdot \left( \frac{r}{d_f} \right)^2 \cdot \cos^4(\theta_i) \cdot S_i}{\pi \cdot \left( \frac{r}{d_f} \right)^2 \cdot \cos^4(\theta_j) \cdot S_j} = \frac{S_i}{S_j}$ .

When the spectral power distribution of the light source in the experiment is  $I(\lambda)$ , according to radiometry Horn (1986); McCluney (2014), the scene radiance  $S(\lambda)$  reflected from the surface of

a color patch on a color card can be calculated as:  $S(\lambda) = R(\lambda)I(\lambda)$  where  $\lambda$  represents the wavelength. For two color patches under the same illumination field, we have

$$\frac{S_i}{S_j} = \frac{R_i \cdot I}{R_j \cdot I} = \frac{R_i}{R_j} \Rightarrow \frac{E_i}{E_j} = \frac{R_i}{R_j} \quad (15)$$

which concludes the proof.

## F.2 PROOF OF THEOREM 2

Prior to proving Theorem 2, we first introduce the following lemma.

**Lemma 4.** *Let the joint distribution  $p(\mathbf{a}, \mathbf{b})$  be symmetric, i.e.,*

$$p(\mathbf{a}, \mathbf{b}) = p(\mathbf{b}, \mathbf{a}) \quad \text{for all } \mathbf{a}, \mathbf{b} \in \mathcal{X}. \quad (16)$$

where  $\mathcal{X}$  denotes a specific probability distribution.

Then the following identity holds:

$$\mathbb{E}_{\mathbf{a}, \mathbf{b}} \left[ b^\top \frac{\partial a}{\partial \theta} \right] = \mathbb{E}_{\mathbf{a}, \mathbf{b}} \left[ a^\top \frac{\partial b}{\partial \theta} \right] \quad (17)$$

where  $a = E_C(\mathbf{a})$ ,  $b = E_C(\mathbf{b})$ ,  $\theta$  represent the trainable parameters in  $E_C$ .

*Proof.* We begin by expanding the expectations as integrals:

$$\begin{aligned} \mathbb{E}_{\mathbf{a}, \mathbf{b}} \left[ b^\top \frac{\partial a}{\partial \theta} \right] &= \iint_{\mathcal{X} \times \mathcal{X}} \left[ E_C(\mathbf{b})^\top \frac{\partial E_C(\mathbf{a})}{\partial \theta} \right] p(\mathbf{a}, \mathbf{b}) d\mathbf{a} d\mathbf{b} \\ \mathbb{E}_{\mathbf{a}, \mathbf{b}} \left[ a^\top \frac{\partial b}{\partial \theta} \right] &= \iint_{\mathcal{X} \times \mathcal{X}} \left[ E_C(\mathbf{a})^\top \frac{\partial E_C(\mathbf{b})}{\partial \theta} \right] p(\mathbf{b}, \mathbf{a}) d\mathbf{b} d\mathbf{a} \end{aligned} \quad (18)$$

Since  $p(\mathbf{a}, \mathbf{b}) = p(\mathbf{b}, \mathbf{a})$  by the symmetry assumption, we perform a change of variables on the right-hand side of the second equation. Let  $u = \mathbf{b}$ ,  $v = \mathbf{a}$ . Then:

$$\begin{aligned} \mathbb{E}_{\mathbf{a}, \mathbf{b}} \left[ a^\top \frac{\partial b}{\partial \theta} \right] &= \iint_{\mathcal{X} \times \mathcal{X}} \left[ E_C(\mathbf{a})^\top \frac{\partial E_C(\mathbf{b})}{\partial \theta} \right] p(\mathbf{a}, \mathbf{b}) d\mathbf{a} d\mathbf{b} \\ &= \iint_{\mathcal{X} \times \mathcal{X}} \left[ E_C(v)^\top \frac{\partial E_C(u)}{\partial \theta} \right] p(v, u) dv du \end{aligned} \quad (19)$$

Using the symmetry  $p(v, u) = p(u, v)$ , we obtain:

$$\mathbb{E}_{\mathbf{a}, \mathbf{b}} \left[ a^\top \frac{\partial b}{\partial \theta} \right] = \iint_{\mathcal{X} \times \mathcal{X}} \left[ E_C(v)^\top \frac{\partial E_C(u)}{\partial \theta} \right] p(u, v) du dv \quad (20)$$

Since  $u$  and  $v$  are dummy variables, we may rename them back to  $\bar{a}$  and  $a$ , respectively:

$$\iint_{\mathcal{X} \times \mathcal{X}} \left[ E_C(v)^\top \frac{\partial E_C(u)}{\partial \theta} \right] p(u, v) du dv = \iint_{\mathcal{X} \times \mathcal{X}} \left[ E_C(\mathbf{b})^\top \frac{\partial E_C(\mathbf{a})}{\partial \theta} \right] p(\mathbf{b}, \mathbf{a}) d\mathbf{a} d\mathbf{b} \quad (21)$$

Therefore, we conclude:

$$\mathbb{E}_{\mathbf{a}, \mathbf{b}} \left[ a^\top \frac{\partial b}{\partial \theta} \right] = \iint_{\mathcal{X} \times \mathcal{X}} \left[ E_C(\mathbf{b})^\top \frac{\partial E_C(\mathbf{a})}{\partial \theta} \right] p(\mathbf{b}, \mathbf{a}) d\mathbf{a} d\mathbf{b} = \mathbb{E}_{\mathbf{a}, \mathbf{b}} \left[ b^\top \frac{\partial a}{\partial \theta} \right] \quad (22)$$

which completes the proof.  $\square$

Based on **Lemma 4**, we now proceed to the proof of Theorem 2 To simplify the notation, we define the variables  $s^+$  and  $s_i^-$  as follows.

$$s^+ = \frac{1}{\tau} z^\top z^+, \quad s_i^- = \frac{1}{\tau} z^\top z_i^- \quad \text{for } i = 1, \dots, K \quad (23)$$

The loss function can then be rewritten as:

$$\mathcal{L}_\theta = \mathbb{E} \left[ -\log \frac{e^{s^+}}{e^{s^+} + \sum_{i=1}^K e^{s_i^-}} \right] = \mathbb{E} \left[ -s^+ + \log \left( e^{s^+} + \sum_{i=1}^K e^{s_i^-} \right) \right] \quad (24)$$

Define the scalar function:

$$\mathcal{L}_\theta(s^+, s_1^-, \dots, s_K^-) = -s^+ + \log \left( e^{s^+} + \sum_{i=1}^K e^{s_i^-} \right) \quad (25)$$

By the multivariate chain rule, the gradient of the loss with respect to the parameters  $\theta$  is:

$$\nabla_\theta \mathcal{L} = \mathbb{E} \left[ \frac{\partial \mathcal{L}}{\partial s^+} \cdot \frac{\partial s^+}{\partial \theta} \right] + \mathbb{E} \left[ \sum_{i=1}^K \frac{\partial \mathcal{L}}{\partial s_i^-} \cdot \frac{\partial s_i^-}{\partial \theta} \right] \quad (26)$$

From Eq.(24), the partial derivatives with respect to  $s^+$  and  $s_i^-$  are computed as:

$$\frac{\partial \mathcal{L}}{\partial s^+} = \left[ -1 + \frac{e^{s^+}}{e^{s^+} + \sum_{j=1}^K e^{s_j^-}} \right] = p(z^+) - 1, \quad \frac{\partial \mathcal{L}}{\partial s_i^-} = \frac{e^{s_i^-}}{e^{s^+} + \sum_{j=1}^K e^{s_j^-}} = p(z_i^-) \quad (27)$$

where  $p(z^+)$  and  $p(z_i^-)$  are defined as in the theorem.

Finally, the gradients of  $s^+$  and  $s_i^-$  with respect to  $\theta$  are given by:

$$\begin{aligned} \frac{\partial s^+}{\partial \theta} &= \frac{1}{\tau} \left( z^\top \frac{\partial z^+}{\partial \theta} + (z^+)^\top \frac{\partial z}{\partial \theta} \right) \\ \frac{\partial s_i^-}{\partial \theta} &= \frac{1}{\tau} \left( z^\top \frac{\partial z_i^-}{\partial \theta} + (z_i^-)^\top \frac{\partial z}{\partial \theta} \right) \end{aligned} \quad (28)$$

Substituting Eq.(28) into Eq.(26), we obtain:

$$\nabla_\theta \mathcal{L} = \frac{1}{\tau} \mathbb{E} \left[ (p(z^+) - 1) \left( z^\top \frac{\partial z^+}{\partial \theta} + (z^+)^\top \frac{\partial z}{\partial \theta} \right) \right] + \frac{1}{\tau} \sum_{i=1}^K \mathbb{E} \left[ p(z_i^-) \left( z^\top \frac{\partial z_i^-}{\partial \theta} + (z_i^-)^\top \frac{\partial z}{\partial \theta} \right) \right] \quad (29)$$

Expanding the terms yields:

$$\begin{aligned} \nabla_\theta \mathcal{L} &= \frac{1}{\tau} \mathbb{E} \left[ (p(z^+) - 1) z^\top \frac{\partial z^+}{\partial \theta} \right] + \frac{1}{\tau} \mathbb{E} \left[ (p(z^+) - 1) (z^+)^\top \frac{\partial z}{\partial \theta} \right] \\ &\quad + \frac{1}{\tau} \sum_{i=1}^K \mathbb{E} \left[ p(z_i^-) z^\top \frac{\partial z_i^-}{\partial \theta} \right] + \frac{1}{\tau} \sum_{i=1}^K \mathbb{E} \left[ p(z_i^-) (z_i^-)^\top \frac{\partial z}{\partial \theta} \right] \end{aligned} \quad (30)$$

$$(31)$$

Since the query sample  $z$  and the positive sample  $z^+$  are independently drawn from the same distribution, their joint distribution is symmetric, i.e.,  $p(z, z^+) = p(z^+, z)$ . According to **Lemma 4**, we have  $\mathbb{E}_{z, z^+} \left[ (z^+)^\top \frac{\partial z}{\partial \theta} \right] = \mathbb{E}_{z, z^+} \left[ z^\top \frac{\partial z^+}{\partial \theta} \right]$ .

In contrast, traditional cross-domain negative samples do not share the same marginal distribution as the query sample, so their joint distribution does not satisfy symmetry. Under the proposed dual-branch contrastive learning framework:

- (1) In the first branch, the query sample satisfies  $z \sim \mathcal{X}$ , the positive sample  $z^+ \sim \mathcal{X}$ , and the negative samples  $z_i^- \sim \mathcal{Y}$ .
- (2) In the second branch, the query sample satisfies  $z \sim \mathcal{Y}$ , the positive sample  $z^+ \sim \mathcal{Y}$ , and the negative samples  $z_i^- \sim \mathcal{X}$ .

This construction enforces symmetry in the joint distribution between query and negative samples across branches, hence:

$$\mathbb{E}_{z, z_i^-} \left[ (z_i^-)^\top \frac{\partial z}{\partial \theta} \right] = \mathbb{E}_{z, z_i^-} \left[ z^\top \frac{\partial z_i^-}{\partial \theta} \right] \quad (32)$$

Using the identity  $p(z^+) - 1 = -(1 - p(z^+))$ , the update direction  $-\nabla_\theta \mathcal{L}$  simplifies to:

$$-\nabla_\theta \mathcal{L} = \frac{1}{\tau} \mathbb{E} \left[ (1 - p(z^+)) \cdot \left( \frac{\partial z^+}{\partial \theta} \right)^\top z - \sum_{i=1}^K p(z_i^-) \cdot \left( \frac{\partial z_i^-}{\partial \theta} \right)^\top z \right] \quad (33)$$

Let  $J_\theta(z) = \frac{\partial z}{\partial \theta}$  denote the Jacobian matrix. Then we can write:

$$-\nabla_\theta \mathcal{L} = \frac{1}{\tau} \mathbb{E} \left[ (1 - p(z^+)) \cdot J_\theta(z^+)^\top z - \sum_{i=1}^K p(z_i^-) \cdot J_\theta(z_i^-)^\top z \right] \quad (34)$$

This completes the proof.

**Corollary 1.** *The gradient decomposition formula has a clear geometric interpretation:*

1. *Positive Sample Attraction Term:*  $(1 - p(z^+)) \cdot J_\theta^\top(z^+)z$ . The weight factor  $1 - p(z^+)$  increases as the similarity between the anchor and the positive sample decreases. Updating the encoder parameter  $\theta$  drives the multi scale features of  $z^+$  and  $z$  to approach, which serves to reduce intra class distance and enhance feature invariance by design.

2. *Negative Sample Repulsion Term:*  $-\sum_{i=1}^K p(z_i^-) \cdot J_\theta^\top(z_i^-)z$ . The weight factor  $p(z_i^-)$  grows with higher similarity between the anchor and negative samples. Optimizing the encoder parameter  $\theta$  enforces the multi scale features of  $z_i^-$  and  $z$  to diverge, achieving the effect of increasing inter-class distance and improving feature discriminability.

### F.3 PROOF OF THEOREM 3

To simplify the notation in the proof, we denote  $I_{\mathcal{H}^+}^i$  from enhanced image and  $\{I_{\mathcal{H}_k^-}^i\}_{k=1}^M$  from irradiance of low light image as a set  $\mathcal{X} = \{X_1, X_2, \dots, X_{M+1}\}$  of  $M+1$  samples, which includes one positive sample and  $M$  negative samples. Following the analysis in Oord et al. (2018), the expression

$$\mathbb{E} \left[ -\log \frac{\sigma(I_{\mathcal{H}^+}^i, I_{\mathcal{H}}^i)}{\sigma(I_{\mathcal{H}^+}^i, I_{\mathcal{H}}^i) + \sum_{k=1}^M \sigma(I_{\mathcal{H}_k^-}^i, I_{\mathcal{H}}^i)} \right]$$

represents the cross-entropy loss for correctly classifying the positive sample within the set  $X$  where  $I_{\mathcal{H}}^i$  denotes the query sample from guide image.

Define the event  $[G_t = 1]$  to indicate that the sample  $X_t$  drawn from  $X$  is the positive sample, and  $[G_t = 0]$  to indicate that  $X_t$  is a negative sample. Then, the optimal probability for this cross-entropy loss is given by the posterior probability  $p(G_t = 1 | X_t, I_{\mathcal{H}}^i)$ . Minimizing this cross-entropy classification loss

$$\min -\mathbb{E} \log [p(G_t = 1 | X_t, I_{\mathcal{H}}^i)]$$

is equivalent to maximizing the likelihood of  $p(G_t = 1 | X_t, I_{\mathcal{H}}^i)$ .

Since the set contains  $M$  negative samples and one positive sample, the prior probabilities are given by:

$$P(G_t = 1) = \frac{1}{M+1}, \quad P(G_t = 0) = \frac{M}{M+1}.$$

Using Bayes' theorem, the posterior probability  $P(G_t = 1 | X_t, I_{\mathcal{H}}^i)$  can be expressed as:

$$\begin{aligned}
 p(G_t = 1 | X_t, I_{\mathcal{H}}^i) &= \frac{p(X_t, I_{\mathcal{H}}^i | G_t = 1) p(G_t = 1)}{p(X_t, I_{\mathcal{H}}^i | G_t = 1) p(G_t = 1) + p(X_t, I_{\mathcal{H}}^i | G_t = 0) p(G_t = 0)} \\
 &= \frac{p(X_t, I_{\mathcal{H}}^i | G_t = 1) \frac{1}{M+1}}{p(X_t, I_{\mathcal{H}}^i | G_t = 1) \frac{1}{M+1} + p(X_t, I_{\mathcal{H}}^i | G_t = 0) \frac{M}{M+1}} \\
 &= \frac{p(X_t, I_{\mathcal{H}}^i | G_t = 1)}{p(X_t, I_{\mathcal{H}}^i | G_t = 1) + (M) p(X_t, I_{\mathcal{H}}^i | G_t = 0)}
 \end{aligned} \tag{35}$$

Since the positive sample and  $I_{\mathcal{H}}^i$  are conditionally independent given the event, we have  $p(X_t, I_{\mathcal{H}}^i | G_t = 1) = p(X_t | I_{\mathcal{H}}^i)$ . Meanwhile, under the assumption that the negative samples are independent of  $I_{\mathcal{H}}^i$ , it follows that:

$$p(X_t, I_{\mathcal{H}}^i | G_t = 0) = p(X_t) \cdot p(I_{\mathcal{H}}^i).$$

Thus Eq.(35) can be further simplified into:

$$p(G_t = 1 | X_t, I_{\mathcal{H}}^i) = \frac{p(X_t, I_{\mathcal{H}}^i)}{p(X_t, I_{\mathcal{H}}^i) + (N-1)p(X_t)p(I_{\mathcal{H}}^i)} \tag{36}$$

Based on the conclusion derived from Eq.(36), the loss function  $L_{mu}$  can be rewritten as follows.

$$\begin{aligned}
 \mathcal{L}_{mu} &= \sum_{i=1}^4 -\mathbb{E} \log \left[ \frac{p(X_t, I_{\mathcal{H}}^i)}{p(X_t, \phi_i(k)) + (N-1)p(X_t)p(I_{\mathcal{H}}^i)} \right] \\
 &= \sum_{i=1}^4 \mathbb{E} \log \left[ \frac{p(X_t, I_{\mathcal{H}}^i) + Mp(X_t)p(I_{\mathcal{H}}^i)}{p(X_t, I_{\mathcal{H}}^i)} \right] \\
 &= \sum_{i=1}^4 \mathbb{E} \log \left[ 1 + M \frac{p(X_t)p(I_{\mathcal{H}}^i)}{p(X_t, I_{\mathcal{H}}^i)} \right] \\
 &= \sum_{i=1}^4 \mathbb{E} \log \left[ 1 + M \frac{p(X_t)}{p(X_t | I_{\mathcal{H}}^i)} \right] \\
 &> \sum_{i=1}^4 \mathbb{E} \log \left[ M \frac{p(X_t)}{p(X_t | I_{\mathcal{H}}^i)} \right] \\
 &= 4 \log [M] + \sum_{i=1}^4 \mathbb{E} \log \left[ \frac{p(X_t)}{p(X_t | I_{\mathcal{H}}^i)} \right]
 \end{aligned} \tag{37}$$

By the definition of mutual information, we have:

$$\sum_{i=1}^4 I(X_t, I_{\mathcal{H}}^i) > 4 \log [M] - L_{mu} \tag{38}$$

Therefore, minimizing the loss function  $L_{mu}$  is equivalent to increasing a lower bound on the mutual information  $\sum_{i=1}^4 I(X_t, I_{\mathcal{H}}^i)$  between the reflection component and the positive sample. This completes the proof.
